# Supplementary material for: Deep Genome Resequencing Reveals Artificial and Natural Selection for Visual Deterioration, Plateau Adaptability and High Prolificacy in Chinese Domestic Sheep
Source: Front Genet. 2019 Apr 2;10:300. doi: 10.3389/fgene.2019.00300 (PMC6454055; doi:10.3389/fgene.2019.00300)
Supplement: Supplementary file 2 [file Table_2.XLSX]

## Sheet: Table S1
Table S1. Sampling information of 5 Chinese native sheep breeds (Ovis aries).
Species	Breed	Abbreviation	Sample Size	Sex	Sampling location	Altitude	Fecundity	Type of samples	Breed characteristic	SRA
Ovis aries	Altay	A1	24	female	Aletai, Xinjiang	803 m	1.103	blood	Horned, short-tailed, low fertility(1)	SRR6960919
		A2	26							SRR6960920
	Duolang	D1	32	female	Kashi, Xinjiang	1289 m	1.3	blood	Hornless, short-tailed, low fertility, large ear, strong resistance(1)(2)	SRR6960921
		D2	29							SRR6960922
	Hu	H1	33	female	Jiangyan, Jiangsu; Jiaxing, Zhejiang	5.5 m; 3.7 m	2.29	blood	Hornless, high fertility(1)(3)	SRR6960917
		H2	25							SRR6960918
	Mongolian	M1	61	female	Ulanqab, Inner Mongolia	965 m - 1489 m	103% - 105%	blood	Horned, low fertility(1)	SRR6960915
		M2	28							SRR6960916
	Tibetan	T1	31	female	Gannan, Gansu; Qilian, Qinghai	3200 m; 4100 m	1	blood	Horned, low fertility, hypoxia adaptability(1)(4)	SRR6960913
		T2	49							SRR6960914
(1) China National Commission of Animal Genetic Resources. (2011). Animal Genetic Resources in China, Sheep and Gaot. Beijing: China Agriculture Press.
(2) C. Wei, H. Wang, G. Liu, M. Wu, J. Cao, Z. Liu, R. Liu, F. Zhao, L. Zhang, J. Lu, C. Liu and L. Du: Genome-wide analysis reveals population structure and selection in Chinese indigenous sheep breeds. BMC Genomics, 16, 194 (2015) doi:10.1186/s12864-015-1384-9
(3) W. Wang, Y. La, X. Zhou, X. Zhang, F. Li and B. Liu: The genetic polymorphisms of TGFbeta superfamily genes are associated with litter size in a Chinese indigenous sheep breed (Hu sheep). Anim Reprod Sci, 189, 19-29 (2018) doi:10.1016/j.anireprosci.2017.12.003
(4) J. Yang, W. R. Li, F. H. Lv, S. G. He, S. L. Tian, W. F. Peng, Y. W. Sun, Y. X. Zhao, X. L. Tu, M. Zhang, X. L. Xie, Y. T. Wang, J. Q. Li, Y. G. Liu, Z. Q. Shen, F. Wang, G. J. Liu, H. F. Lu, J. Kantanen, J. L. Han, M. H. Li and M. J. Liu: Whole-Genome Sequencing of Native Sheep Provides Insights into Rapid Adaptations to Extreme Environments. Mol Biol Evol, 33(10), 2576-92 (2016) doi:10.1093…

## Sheet: Table S2
Table S2. Publically available whole genome sequencing data of Asian mouflon (Ovis orientalis) used for analyses.
		Run	BioSample	MBases	MBytes	Experiment	LoadDate	Closest city	Closest locality	Latitude	Longitude	Sampling date	sex
Ovis orientalis	Asian mouflon	ERR157930	SAMEA2012638	38620	26566	ERX133888	2014-10-05	Urmia	Kaboudan	37.481 degrees	45.628 degrees	2011-02-09	male
		ERR157931	SAMEA2012641	38224	25490	ERX133884	2014-10-07	Urmia	Kaboudan	37.485 degrees	45.653 degrees	2011-02-04	male
		ERR157932	SAMEA2012642	37628	25541	ERX133890	2014-10-04	Tabriz	Sahand	37.746767 degrees	46.393425 degrees	2011-11-17	male
		ERR157935	SAMEA2012643	38178	25892	ERX133889	2014-10-06	Tabriz	kimakai	38.769 degrees	46.147 degrees	2011-12-01	female
		ERR157938	SAMEA2012637	40191	28240	ERX133885	2014-10-02	Marand	Marakan	38.931678 degrees	45.385152 degrees	2011-01-26	male
		ERR157939	SAMEA2012639	36147	24766	ERX133880	2014-10-02	Urmia	Kaboudan	37.49 degrees	45.599 degrees	2011-02-22	male
		ERR157942	SAMEA2012640	38285	25721	ERX133883	2014-10-12	Urmia	Kaboudan	37.485 degrees	45.653 degrees	2011-02-10	male
		ERR157944	SAMEA1967031	38149	25666	ERX133878	2014-12-09	Tabriz	Sahand	37.855 degrees	46.57 degrees	2010-11-29	male
		ERR315509	SAMEA2065604	35947	26051	ERX288648	2014-12-14	Golpayegan	Mute	33.697 degrees	50.804 degrees	2011-12-03	female
		ERR332573	SAMEA1972234	42191	29627	ERX306479	2015-08-07	Qazvin	Bashgol	36.721474 degrees	49.32136 degrees	2011-08-15	male
		ERR332575	SAMEA2065601	40287	27690	ERX306463	2014-10-02	urumie	Kaboudan	37.48705 degrees	45.63713 degrees	2011-11-27	male
		ERR332582	SAMEA2065603	42220	29292	ERX306476	2014-10-07	Hamedan	<not provided>	34.643225 degrees	48.621857 degrees	2011-09-07	male
		ERR332587	SAMEA2065602	36693	24047	ERX306464	2014-10-06	Hamedan	<not provided>	34.704635 degrees	48.862971 degrees	2011-08-24	female
		ERR332589	SAMEA2065600	37972	25212	ERX306472	2014-10-11	Urmia	Kaboudan	37.485 degrees	45.599 degrees	2011-02-20	male
		ERR340346	SAMEA1964491	35991	25713	ERX313211	2014-10-06	arak	khomein	34.178 degrees	50.344 degrees	2011-01-31	male
		ERR466544	SAMEA2395411	35147	24249	ERX432781	2014-10-02	Qazvin	Bashgol	36.96578 degrees	49.33161 degrees	2012-04-08	male
		ERR466546	SAMEA2395410	36906	26208	ERX432779	2014-10-12	Qazvin	Bashgol	36.61114 degrees	49.11678 degrees	2013-06-20	female

## Sheet: Table S3
Table S3. Sequencing reads, alignment statistics and mean genome-wide coverage of each sample.
Breed	Pool ID	Raw Data						Clean Data								Average Length of Reads (bp)	Mapping rate (%)	Average Sequencing depth
		Raw Reads (M)	Raw Base (Gb)	Raw Q20 (G)	Proportion of Raw Q20 (%)	Raw Q30(G)	Proportion of Raw Q30 (%)	Clean Reads (M)	Proportion of Clean Base (%)	Clean Base (Gb)	Proportion of Clean Reads (%)	Raw Q20 (G)	Proportion of Q20 (%)	Raw Q30(G)	Proportion of Q30 (%)
Altay	A1	839.98	125.997	120.97	0.9601	115.528	0.916911	748.621	0.891237	102.98	0.817321	101.695	0.987522	98.902	0.9604	137.6	0.9767	39.4963
	A2	966.941	145.041	140.248	0.967	134.4	0.926635	897.01	0.927678	128.853	0.88839	127.273	0.987738	123.852	0.961188	143.6	0.9784	49.4195
Duolang	D1	873.705	131.056	126.221	0.9631	120.589	0.920133	797.895	0.913232	110.494	0.843105	108.992	0.986407	105.748	0.957047	138.5	0.9513	42.3782
	D2	969.201	145.38	139.425	0.959	132.835	0.913709	871.034	0.898713	120.401	0.828181	118.706	0.985922	115.13	0.956221	138.2	0.9779	46.1779
Hu	H1	866.921	130.038	125.018	0.9614	118.524	0.911457	792.446	0.914093	114.366	0.879481	112.617	0.984707	108.858	0.951839	144.3	0.9804	43.8633
	H2	912.652	136.898	131.506	0.9606	124.518	0.909568	834.878	0.914782	120.293	0.878705	118.386	0.984147	114.331	0.950438	144.1	0.9784	46.1365
Mongolian	M1	1073.4	161.01	154.937	0.9623	147.803	0.917974	967.757	0.901582	132.536	0.823154	130.81	0.986977	126.947	0.95783	137	0.9815	50.8321
	M2	884.465	132.67	126.05	0.9501	118.825	0.895643	760.985	0.86039	101.86	0.76777	100.298	0.984665	96.84	0.950717	133.9	0.98	39.0668
Tibetan	T1	1047.76	157.164	148.858	0.9472	140.661	0.894995	890.502	0.849909	114.474	0.728373	112.805	0.98542	109.066	0.952758	128.6	0.9722	43.9047
	T2	1077.94	161.691	152.781	0.9449	142.425	0.880847	924.72	0.857859	125.729	0.777588	123.215	0.980005	117.896	0.937699	136	0.9629	48.2214
Total/Mean		9512.97	1426.94	1366.01	0.95757	1296.11	0.908787	8485.85	0.892947	1171.99	0.823207	1154.8	0.985351	1117.57	0.953614	138.18	0.97397	44.9497

## Sheet: Table S4
Table S4. Summary information for SNPs identified in the present study with the Ovirs aries dbSNP database.
Breeds	Total SNP	Total SNP rate of Genome (‰)	No. of Heterozygous	Heterozygous rate of Total SNP (%)	Heterozygous rate of Genome (‰)	SNP in Placed Chromosome	Ovis aries dbSNP version 143		Identified Rate in dbSNP (%)
							No Validated	Validated
Altay	9885026	3.79124	9327519	0.943601	3.57742	9838971	653055	9231971	93.3935
Duolang	9567487	3.66946	8824735	0.922367	3.38459	9522572	619779	8947708	93.522
Hu	9763808	3.74475	9147767	0.936906	3.50848	9718334	635786	9128022	93.4883
Mongolian	9691361	3.71697	9053114	0.934143	3.47218	9646094	636980	9054381	93.4273
Tibetan	9432859	3.61782	8552614	0.906683	3.28022	9388376	647413	8785446	93.1366
Ovis orientalis	15764583	6.04626	14592414	0.925645	5.59669	15699544	3955336	11809247	74.91

## Sheet: Table S5
Table S5. Summary of SNP calling among the five native sheep breeds and Ovis orientalis.
Category		Number of the shared SNPs	Number of the private SNPs
Ovis aries	Altay	/	327582
	Altay vs Duolang	7993785	/
	Altay vs Hu	8425991	/
	Altay vs Mongolian	8612216	/
	Altay vs Tibetan	8353608	/
	Duolang	/	597180
	Duolang vs Hu	7869411	/
	Duolang vs Mongolian	8022696	/
	Duolang vs Tibetan	7814488	/
	Hu	/	386833
	Hu vs Mongolian	8491581	/
	Hu vs Tibetan	8260868	/
	Mongolian	/	370415
	Mongolian vs Tibetan	8415662	/
	Tibetan	/	358796
	Altay vs Duolang vs Hu	7372502	/
	Altay vs Duolang vs Mongolian	7506435	/
	Altay vs Duolang vs Tibetan	7328193	/
	Altay vs Hu vs Mongolian	7935228	/
	Altay vs Hu vs Tibetan	7740343	/
	Altay vs Mongolian vs Tibetan	7879880	/
	Duolang vs Hu vs Mongolian	7401399	/
	Duolang vs Hu vs Tibetan	7239989	/
	Duolang vs Mongolian vs Tibetan	7355441	/
	Hu vs Mongolian vs Tibetan	7787535	/
	Altay vs Duolang vs Hu vs Mongolian	7109456	/
	Altay vs Duolang vs Hu vs Tibetan	6966528	/
	Altay vs Duolang vs Mongolian vs Tibetan	7071229	/
	Altay vs Hu vs Mongolian vs Tibetan	7465644	/
	Duolang vs Hu vs Mongolian vs Tibetan	6991695	/
	Altay vs Duolang vs Hu vs Mongolian vs Tibetan	6799650	/
Ovis orientalis	Ovis aries	/	934499
	Ovis orientalis	/	9899432
	Ovis aries vs Ovis orientalis	5865151	/

## Sheet: Table S6
Table S6. The SNP summary statistics in the five Chinese native sheep breeds.
Breeds	Chromosome	Total SNP	Downstream	Intergenic	Intronic	Splicing	Upstream	Upstream/Downstream	UTR3	UTR5	UTR5/UTR3	Exonic/Splicing_nonsynonymous	Exonic/Splicing_synonymous	ncRNA_exonic/splicing	ncRNA_intronic	ncRNA_splicing	ncRNA_exonic	exonic
																		Stop gain	Stop loss	Synonymous	Nonsynonymous	Ratio of nonsynonymous/synonymous	Numbers of SNPs per bp in exonic region	Numbers of SNPs per bp in intronic region	Numbers of SNPs per bp in intergenic region	Numbers of SNPs per bp in chromsome
Altay	1	1058220	5964	643426	370765	5	936	15	5670	4060	3	1	3	0	19583	3	3011	34	8	2903	1830	0.630382	0.000847614	0.00350682	0.00415355	0.00384239
	2	939355	4235	549616	344733	7	2327	61	4659	3829	0	1	2	0	22021	5	3904	17	4	2578	1356	0.525989	0.000962134	0.00358096	0.00397178	0.00377302
	3	826811	5276	492997	296554	14	1765	48	5185	3804	4	2	3	0	13301	4	3147	26	4	2889	1788	0.618899	0.000873031	0.0033521	0.00402237	0.00369119
	4	463617	1973	260616	185727	6	1188	15	2204	1592	1	0	0	0	7164	6	1425	8	4	1028	660	0.642023	0.000889074	0.00360005	0.00419525	0.00388886
	5	402451	3113	242596	119412	23	4702	121	2411	1673	1	0	1	0	24116	5	1433	19	3	1642	1180	0.718636	0.00091133	0.00331374	0.00405475	0.00373206
	6	493985	1784	314454	162183	1	1226	22	2025	1414	4	1	0	0	7854	4	1425	7	2	981	598	0.609582	0.00109931	0.00389858	0.00445829	0.00422613
	7	378737	2531	209393	148593	9	1475	38	2956	2142	0	2	0	0	7885	4	1515	9	6	1333	846	0.634659	0.000856864	0.00336394	0.004259	0.003787
	8	357500	1555	217026	123096	5	557	2	1606	1118	0	0	0	0	10082	3	1218	2	0	813	417	0.512915	0.000995435	0.00373826	0.00413161	0.00394526
	9	390063	1552	254691	117731	19	2948	77	1298	1042	0	0	0	0	8305	4	1247	3	3	736	407	0.552989	0.0010406	0.00376498	0.00433112	0.00412402
	10	352924	1087	247579	93559	1	912	2	1097	743	0	0	1	1	5740	1	1179	3	0	668	351	0.525449	0.00119708	0.00360826	0.00434207	0.00408585
	11	206287	2618	105229	84843	17	1310	98	2277	1641	0	0	1	0	5106	3	921	8	5	1458	752	0.515775	0.000689031	0.00299203	0.0038203	0.00331809
	12	305068	1734	173788	117537	3	786	12	1752	1418	3	0	0	0	5263	1	1234	12	6	925	594	0.642162	0.000879218	0.00351798	0.00424176	0.00386021
	13	296061	2012	162916	116958	12	1446	25	1801	1748	0	1	0	1	6305	3	1326	12	7	949	539	0.567966	0.000830137	0.00343438	0.00373254	0.0035691
	14	207456	2740	117200	69495	6	924	25	2354	1855	2	1	1	0	8974	2	1259	20	9	1447	1142	0.789219	0.000929188	0.00296798	0.00366738	0.00331567
	15	319892	3397	191545	105876	9	1047	22	1845	1560	0	1	0	0	11071	3	979	12	12	1368	1145	0.836988	0.00108044	0.0035827	0.00426728	0.00395988
	16	298763	1098	193224	89838	9	1513	41	1024	750	4	0	1	0	9383	3	1126	0	1	478	270	0.564854	0.00116668	0.0038195	0.00438065	0.00416725
	17	283572	1367	177886	92712	6	1640	65	1284	1043	0	2	1	0	5260	4	916	13	0	910	463	0.508791	0.00089689	0.00348544	0.00427862	0.00392481
	18	260234	1393	165843	78664	12	2142	108	1007	925	0	1	0	0	7671	1	1257	3	1	740	466	0.62973	0.00107986	0.00337021	0.00408552	0.00379934
	19	223291	1200	98508	106589	11	3450	34	1322	1438	0	0	0	1	8198	1	1363	4	0	766	406	0.530026	0.000868157	0.00343604	0.00408505	0.00369408
	20	187327	1792	110999	65582	7	1036	43	1776	1279	0	0	0	0	2480	0	927	8	4	787	607	0.771283	0.000901565	0.00325447	0.00402924	0.00366952
	21	193316	1511	101194	74114	4	927	8	885	734	1	1	0	0	12016	4	571	8	3	817	518	0.634027	0.000938098	0.00356611	0.00425325	0.00386725
	22	206188	1016	113500	84216	8	1210	57	1258	952	0	1	0	0	2378	1	666	8	1	594	322	0.542088	0.000872683	0.00384432	0.00429407	0.00406041
	23	252055	1007	168296	73678	13	1683	31	1012	684	0	0	0	0	3944	2	918	1	1	493	292	0.592292	0.000994175	0.00355131	0.00434755	0.00404694
	24	154643	1362	77888	63246	25	5213	106	1071	885	0	0	0	0	3066	0	426	12	0	841	502	0.596908	0.00076007	0.00342979	0.00383695	0.00368401
	25	197067	1140	103586	82327	22	2484	120	1061	963	0	0	1	0	3344	0	1111	5	2	561	340	0.606061	0.00121168	0.00404335	0.00463077	0.00435762
	26	184328	698	101647	66733	21	3779	88	687	600	0	0	0	0	8668	3	874	5	0	336	189	0.5625	0.00126076	0.00394533	0.00426694	0.00418479
	X	279123	1309	183129	81574	5	1152	18	1113	798	1	0	2	0	8529	2	614	9	3	530	335	0.632075	0.000405317	0.00190759	0.00217304	0.00206474
	Total	9718334	56464	5778772	3416335	280	49778	1302	52640	40690	24	15	17	3	237707	72	35992	268	89	29571	18315	0.619357	0.00090441	0.00344988	0.00403405	0.00238488
Duolang	1	1024585	5819	618812	359140	26	5158	112	5493	3916	3	1	3	0	18557	2	2889	30	8	2819	1797	0.63746	0.000821161	0.00339317	0.00399465	0.00231838
	2	906385	4123	528100	333301	23	3819	87	4448	3772	0	1	2	0	21094	4	3746	16	4	2526	1319	0.522169	0.000931772	0.00346029	0.00381629	0.00240859
	3	799383	5152	473272	287360	22	4592	126	4949	3658	4	2	4	0	12654	3	3047	26	4	2794	1714	0.613457	0.00084313	0.00324563	0.00386144	0.00234458
	4	447002	1928	250372	179299	15	1718	44	2100	1491	1	0	0	0	6986	4	1403	7	3	972	659	0.677984	0.000866029	0.00347676	0.00403035	0.00288626
	5	383814	3040	231455	115617	19	2903	77	2385	1660	1	0	1	0	22502	4	1379	17	4	1580	1170	0.740506	0.00088427	0.00318886	0.00386854	0.00193242
	6	467198	1655	295873	154487	9	1456	33	1906	1367	4	1	0	0	7555	3	1327	7	1	942	572	0.607219	0.00103947	0.00371528	0.00419485	0.0021903
	7	368885	2439	203417	144423	7	2279	54	2858	2045	0	2	0	0	7727	5	1495	9	7	1287	831	0.645688	0.000838383	0.0032709	0.00413745	0.00293752
	8	344588	1481	207869	119217	6	1185	17	1562	1107	0	0	0	0	9764	2	1181	1	0	788	408	0.517766	0.000966181	0.00362045	0.00395729	0.00226958
	9	374644	1438	244835	114414	1	1212	20	1225	994	0	1	0	0	8183	4	1189	3	3	719	403	0.560501	0.00100629	0.00366225	0.00416352	0.00194566
	10	335904	1062	234763	89736	5	955	15	1045	718	0	0	1	1	5492	1	1135	2	0	645	328	0.508527	0.00114759	0.00346033	0.0041173	0.0015738
	11	200887	2631	102183	81899	13	2133	110	2248	1573	0	0	1	0	4988	2	903	8	4	1432	759	0.530028	0.000680703	0.00289018	0.00370972	0.00297331
	12	297150	1715	167858	115080	8	1493	35	1729	1356	3	0	0	0	5154	2	1206	11	6	902	592	0.656319	0.000862085	0.00344446	0.00409702	0.00280883
	13	290030	1950	159476	114584	14	1697	32	1770	1680	0	1	0	1	6028	3	1282	12	7	950	543	0.571579	0.000818709	0.00336052	0.00365373	0.00262521
	14	206813	2735	115893	68843	24	2475	131	2295	1835	3	1	1	0	8789	2	1220	20	9	1414	1123	0.794201	0.000907378	0.00293633	0.00362648	0.00215421
	15	307988	3247	181708	101938	11	3359	35	1785	1531	0	1	0	0	10944	3	970	12	12	1311	1121	0.855072	0.00105278	0.00345817	0.00404813	0.002271
	16	286171	1061	184553	87091	4	899	8	953	714	4	0	1	0	9043	1	1109	1	1	468	260	0.555556	0.00114428	0.00370066	0.00418407	0.00197447
	17	271700	1351	169556	90381	10	1046	19	1216	1020	0	2	1	0	4846	3	887	11	0	889	462	0.519685	0.000876241	0.00338778	0.00407826	0.0021739
	18	250310	1380	159436	76521	9	1167	59	950	895	0	1	0	0	7486	1	1225	4	1	721	454	0.629681	0.00105272	0.00327933	0.00392769	0.00188509
	19	215778	1181	96399	104035	9	1034	43	1308	1428	0	0	0	1	7847	1	1316	4	0	766	406	0.530026	0.000852086	0.00334908	0.00399759	0.00431425
	20	184078	1741	108032	64767	6	1662	66	1770	1273	0	0	0	0	2463	0	907	9	3	775	604	0.779355	0.00088804	0.00321468	0.00392154	0.00235103
	21	188776	1496	97962	72645	13	1396	30	868	717	1	1	0	0	11776	4	558	10	3	796	500	0.628141	0.00091363	0.00349535	0.00411741	0.00305332
	22	200034	993	110144	82000	7	917	25	1239	917	0	1	0	0	2261	1	635	7	1	579	307	0.530225	0.000838675	0.00374074	0.0041671	0.00310232
	23	242396	964	162068	71348	3	779	13	989	673	0	0	0	0	3847	1	935	1	1	493	281	0.56998	0.000997674	0.00344027	0.00418666	0.00184311
	24	148309	1349	76839	62086	17	1288	99	1063	871	0	0	0	0	2918	0	415	13	0	841	510	0.606421	0.000759217	0.00336213	0.00378527	0.0030585
	25	186601	1095	98609	78994	1	883	2	958	925	0	0	1	0	3212	0	1058	5	2	539	317	0.588126	0.00115286	0.00387981	0.00440827	0.00353139
	26	176250	689	99059	64779	5	546	2	654	585	0	0	0	0	8546	3	857	5	0	331	189	0.570997	0.00124101	0.0038367	0.0041583	0.00271929
	X	282717	1324	186661	81473	5	1200	20	1110	814	1	0	2	0	8616	2	599	10	3	537	340	0.633147	0.000404773	0.00190729	0.00221495	0.000966773
	Total	9388376	55039	5565204	3315458	292	49251	1314	50876	39535	25	16	18	3	229278	61	34873	261	87	28816	17969	0.623577	0.000880478	0.00334668	0.00388496	0.00231446
Hu	1	1055820	5917	639007	368721	24	5220	112	5643	4043	3	1	3	0	19313	3	2993	33	8	2926	1850	0.632262	0.000850227	0.00348603	0.00412502	0.00238023
	2	938658	4216	549065	343747	23	3781	87	4581	3822	0	1	2	0	21450	4	3894	18	5	2580	1382	0.535659	0.000964582	0.00356575	0.0039678	0.00248407
	3	824208	5297	489649	294557	21	4675	120	5201	3785	3	2	3	0	13083	4	3108	28	5	2893	1774	0.613204	0.000867918	0.00332813	0.00399506	0.0024033
	4	460953	2000	258215	185009	13	1748	43	2217	1550	1	0	0	0	7005	8	1434	8	3	1014	685	0.675542	0.000894479	0.00358368	0.0041566	0.00297817
	5	397069	3072	240187	118952	18	2970	76	2374	1697	1	0	1	0	23473	4	1405	15	4	1640	1180	0.719512	0.000904299	0.00328827	0.00401449	0.00198817
	6	487728	1768	310761	159291	9	1475	36	2003	1425	4	1	0	0	7991	3	1373	9	2	981	596	0.607543	0.00108033	0.00383542	0.00440593	0.00225841
	7	375871	2481	206419	148021	9	2296	52	2946	2126	0	2	0	0	7829	5	1519	9	6	1309	842	0.643239	0.00085132	0.00335044	0.00419851	0.00301071
	8	353652	1497	213722	121896	5	1192	16	1587	1132	0	0	0	0	10176	3	1200	2	0	803	421	0.524284	0.000985684	0.00370721	0.00406871	0.00232058
	9	385077	1479	252596	116841	2	1185	20	1296	1030	0	1	0	0	8220	4	1263	3	3	737	397	0.53867	0.00104364	0.00373585	0.0042955	0.00198693
	10	350085	1068	245991	92513	5	951	14	1050	756	0	0	1	1	5560	1	1156	4	0	664	350	0.527108	0.0011824	0.00356371	0.00431422	0.00162251
	11	206316	2613	104264	84875	13	2159	107	2286	1664	0	0	1	0	5135	3	927	8	4	1478	779	0.527064	0.000700427	0.00299406	0.00378527	0.00308136
	12	303300	1715	172720	116172	7	1480	39	1774	1368	3	0	0	0	5251	2	1227	12	6	920	604	0.656522	0.000878584	0.00347853	0.00421569	0.00283549
	13	294869	1961	162255	116320	16	1699	29	1813	1724	0	1	0	1	6230	4	1294	12	7	966	537	0.555901	0.000825155	0.00341451	0.0037174	0.00266499
	14	207461	2741	116642	68717	25	2444	118	2297	1844	3	1	1	0	8792	2	1240	22	9	1430	1133	0.792308	0.000918882	0.00293167	0.00364992	0.00215027
	15	319103	3464	189362	104917	11	3445	33	1780	1524	0	1	0	0	11076	3	1015	12	12	1329	1119	0.841986	0.00107153	0.00355348	0.00421865	0.00233736
	16	296407	1102	192284	89100	4	945	9	1013	726	4	0	1	0	9327	2	1123	0	1	490	276	0.563265	0.00117601	0.00378893	0.00435934	0.00202002
	17	280404	1414	176090	91874	10	1081	21	1337	1041	0	2	1	1	5219	5	908	12	0	908	480	0.528634	0.000899228	0.00345417	0.00423542	0.00220981
	18	257176	1383	164226	78169	8	1199	58	1008	935	0	1	0	0	7704	1	1244	5	1	750	484	0.645333	0.0010873	0.00335217	0.00404569	0.00192568
	19	219027	1226	97926	105735	8	1034	41	1375	1432	0	0	0	1	7775	0	1285	4	0	779	406	0.521181	0.000845931	0.00339781	0.00406092	0.00438475
	20	186874	1768	110168	65365	6	1642	65	1758	1268	0	0	0	0	2458	1	928	11	3	821	612	0.745432	0.000917796	0.00324304	0.00399908	0.00237274
	21	193737	1515	100690	74549	8	1393	22	886	742	1	1	0	0	11985	4	595	8	3	817	518	0.634027	0.000949842	0.00358284	0.00423207	0.00313335
	22	202853	982	111739	83118	6	924	28	1241	945	0	1	0	0	2316	1	656	7	1	575	313	0.544348	0.000851291	0.00379282	0.00422744	0.00314462
	23	248865	989	166941	72837	3	812	10	994	684	0	0	0	0	3887	2	922	1	1	494	288	0.582996	0.000994759	0.00351022	0.00431254	0.00188158
	24	149322	1346	77130	62653	18	1275	98	1050	860	0	0	0	0	3122	0	416	13	0	836	505	0.604067	0.000755376	0.00340201	0.00379961	0.00308643
	25	193454	1121	102727	81385	1	909	3	1032	932	0	0	1	0	3365	0	1097	5	2	540	334	0.618519	0.00118707	0.00399988	0.00459237	0.00363828
	26	179795	712	100513	66628	5	579	1	673	581	0	0	0	0	8690	2	869	5	0	341	196	0.57478	0.00126705	0.00394098	0.00421934	0.00279691
	X	278010	1337	182515	81217	5	1198	19	1127	792	1	0	2	0	8271	2	624	10	3	541	346	0.639556	0.000414287	0.00189457	0.00216576	0.000963735
	Total	9646094	56184	5733804	3393179	283	49711	1277	52342	40428	24	16	17	4	234703	73	35715	276	89	29562	18407	0.622657	0.000902413	0.00342519	0.00400266	0.00236871
Mongolian	1	1077117	5962	652580	375452	27	5236	111	5775	4087	2	1	3	0	19900	3	3084	37	8	2963	1886	0.636517	0.000868516	0.00355177	0.00421264	0.00242368
	2	954557	4256	557627	350143	23	3821	83	4729	3953	0	1	2	0	21969	4	3931	18	5	2608	1384	0.530675	0.000972785	0.00363327	0.00402967	0.0025303
	3	840728	5401	498595	301317	21	4751	131	5268	3887	4	2	4	0	13396	4	3172	26	5	2939	1805	0.614154	0.000883369	0.00340465	0.00406805	0.00245845
	4	469771	2017	263256	188312	13	1756	50	2253	1614	1	0	0	0	7265	7	1500	9	3	1037	678	0.653809	0.000918093	0.00365018	0.00423775	0.00303134
	5	406361	3172	245758	121788	18	3066	78	2395	1707	1	0	1	0	24048	5	1443	16	4	1640	1221	0.744512	0.000921345	0.00336703	0.0041076	0.00203557
	6	498195	1816	316320	163972	9	1490	34	2030	1430	4	1	0	0	8057	2	1418	7	2	996	607	0.609438	0.00110551	0.00394426	0.00448475	0.00232478
	7	382968	2529	211032	150127	6	2349	66	2938	2173	0	2	0	0	8038	4	1522	8	6	1336	832	0.622754	0.000855709	0.00340021	0.00429233	0.00305354
	8	361182	1557	218924	123843	5	1220	14	1576	1137	0	0	0	0	10403	5	1247	2	0	822	427	0.519465	0.00101494	0.00376823	0.00416775	0.00235765
	9	392541	1553	256823	119474	2	1238	20	1324	1079	0	1	0	0	8535	4	1325	4	3	753	403	0.535193	0.00108055	0.00382392	0.00436738	0.0020317
	10	358330	1092	251786	94524	5	960	13	1114	769	0	0	1	1	5836	2	1206	4	0	668	349	0.522455	0.00121122	0.00364681	0.00441586	0.00165777
	11	209350	2679	106519	85448	13	2190	113	2302	1679	0	0	1	0	5200	3	924	9	5	1473	792	0.537678	0.000701961	0.00301528	0.00386713	0.00310216
	12	309979	1760	176131	119191	7	1532	32	1779	1399	4	0	0	0	5332	2	1248	12	6	930	614	0.660215	0.000891593	0.00356734	0.00429894	0.00290917
	13	299525	2005	165033	118034	15	1714	32	1835	1718	0	1	0	1	6264	3	1319	12	7	985	547	0.55533	0.000840979	0.00346322	0.00378104	0.00270426
	14	211752	2770	119073	70065	24	2524	126	2361	1885	3	1	1	0	9027	2	1243	20	9	1467	1151	0.784594	0.000932303	0.00299155	0.00372599	0.00219245
	15	327947	3492	194478	108067	10	3518	35	1889	1585	0	1	0	0	11248	3	1053	14	11	1377	1166	0.846768	0.00111271	0.00365525	0.00433263	0.00240754
	16	302990	1103	196330	91457	4	961	9	1068	741	4	0	1	0	9395	2	1148	2	1	484	280	0.578512	0.00119157	0.00388228	0.00445107	0.00207345
	17	285519	1394	179542	93640	9	1075	20	1314	1036	0	2	1	1	5169	5	920	13	0	907	471	0.519294	0.000900397	0.00351522	0.00431845	0.00225228
	18	262077	1456	167647	79507	8	1225	59	1007	917	0	1	0	0	7746	1	1259	4	1	756	483	0.638889	0.00109561	0.00340604	0.00412996	0.00195865
	19	222679	1229	99608	107283	8	1048	40	1356	1508	0	0	0	1	8089	1	1323	4	0	775	406	0.523871	0.000857557	0.00345355	0.00413067	0.00444894
	20	189357	1790	111791	66098	6	1684	63	1792	1291	0	0	0	0	2469	0	937	8	3	816	609	0.746324	0.000917023	0.00327861	0.00405799	0.00239935
	21	195197	1546	101636	74911	13	1419	27	886	740	1	1	0	0	12092	4	564	10	3	825	519	0.629091	0.000940055	0.00360226	0.00427183	0.00314856
	22	208585	1033	114957	85425	6	932	25	1268	946	0	1	0	0	2399	1	694	6	1	586	305	0.520478	0.000873232	0.00389892	0.00434919	0.0032319
	23	253641	1015	169900	74521	3	803	13	1010	688	0	0	0	0	3948	1	933	1	1	509	295	0.579568	0.001014	0.00359006	0.00438898	0.00192508
	24	151989	1362	78185	64146	18	1302	103	1046	888	0	0	0	0	3141	0	423	13	0	849	513	0.60424	0.000767325	0.00348022	0.00385158	0.00315998
	25	196878	1121	104303	83120	1	908	2	1003	984	0	0	1	0	3412	0	1124	5	2	556	336	0.604317	0.00121408	0.00408398	0.00466282	0.00371584
	26	182696	739	102282	67507	5	575	2	708	617	0	0	0	0	8850	3	872	5	0	339	192	0.566372	0.00126435	0.00399535	0.00429359	0.00283381
	X	287060	1365	189034	83271	5	1190	20	1146	823	1	0	2	0	8653	2	642	10	2	551	343	0.622505	0.000420812	0.00194614	0.00224311	0.000988108
	Total	9838971	57214	5849150	3460643	284	50487	1321	53172	41281	25	16	18	4	239881	73	36474	279	88	29947	18614	0.621565	0.00091694	0.00349377	0.00408318	0.00241581
Tibetan	1	1043082	5830	631825	363799	27	5142	105	5580	3953	2	1	3	0	19145	3	2927	36	8	2869	1827	0.636807	0.00083466	0.0034403	0.00407866	0.00234845
	2	922069	4191	538624	338204	21	3712	84	4599	3809	0	2	2	0	21088	5	3787	17	4	2558	1362	0.532447	0.000946096	0.0035081	0.00389235	0.00244402
	3	809926	5213	480103	290236	21	4557	124	5100	3739	2	2	4	0	13145	4	3050	24	4	2842	1756	0.617875	0.000853245	0.00328206	0.00391717	0.00236804
	4	453455	1930	253451	182570	13	1702	45	2170	1515	1	0	0	0	6938	8	1440	7	2	1006	657	0.653082	0.000885375	0.00353691	0.00407992	0.00293891
	5	393708	3067	238608	117451	19	2945	81	2368	1659	1	0	1	0	23298	4	1408	17	4	1608	1169	0.72699	0.000896202	0.00324958	0.0039881	0.00196308
	6	482437	1746	306634	158408	9	1462	36	1963	1383	4	1	0	0	7801	4	1389	8	2	980	607	0.619388	0.00108946	0.00381082	0.00434742	0.00224589
	7	372558	2467	205232	146114	6	2294	59	2898	2146	0	2	0	0	7677	4	1507	10	6	1313	823	0.626809	0.000845313	0.00330618	0.00417436	0.00297192
	8	349117	1511	211610	119717	5	1167	15	1555	1081	0	0	0	0	10017	3	1205	1	0	811	419	0.516646	0.000989747	0.00364158	0.00402851	0.0022791
	9	381397	1476	249967	115852	2	1191	22	1272	1005	0	1	0	0	8234	4	1228	3	3	730	407	0.557534	0.00102974	0.00370673	0.00425079	0.00197011
	10	343189	1077	240510	91016	5	927	13	1096	743	0	0	1	1	5613	1	1170	4	0	655	357	0.545038	0.00118892	0.00351124	0.0042181	0.00159625
	11	202661	2613	103023	82803	12	2117	106	2237	1648	0	0	1	0	4945	3	918	8	4	1464	759	0.518443	0.000691004	0.00291882	0.00374021	0.00300613
	12	301788	1734	171581	115972	9	1478	35	1766	1354	3	0	0	0	5132	2	1191	12	5	919	595	0.647443	0.000863671	0.00346939	0.00418789	0.0028306
	13	289949	1940	158858	114998	14	1645	30	1794	1636	0	1	0	1	6244	4	1289	11	7	949	528	0.556375	0.000815779	0.00337807	0.00363957	0.0026347
	14	206579	2727	116064	68420	24	2435	122	2293	1844	2	1	1	0	8787	2	1243	21	9	1443	1141	0.790714	0.000924394	0.00292025	0.00363184	0.00214098
	15	316909	3357	188099	104358	11	3377	33	1789	1538	0	1	0	0	10877	3	1020	13	11	1319	1103	0.83624	0.00106508	0.00353026	0.00419051	0.00232491
	16	292902	1080	189858	88094	5	915	8	1028	740	4	0	1	0	9318	2	1120	1	1	469	258	0.550107	0.0011505	0.00374986	0.00430434	0.00199721
	17	277504	1387	174421	90897	10	1056	21	1310	1025	0	2	1	0	5069	4	910	12	0	907	472	0.520397	0.000896501	0.00341408	0.00419528	0.00218631
	18	253848	1367	162506	76886	8	1149	59	967	920	0	1	0	0	7555	1	1230	3	1	729	466	0.639232	0.00106322	0.00329627	0.00400332	0.00189408
	19	214626	1175	95749	103811	9	1009	39	1313	1416	0	0	0	1	7664	0	1276	4	1	760	399	0.525	0.000834306	0.00333689	0.00397064	0.00430496
	20	185907	1768	109392	65116	7	1629	65	1787	1321	0	0	0	0	2475	0	921	7	4	810	605	0.746914	0.000906975	0.00323195	0.00397091	0.0023637
	21	190088	1514	98761	73074	11	1383	26	871	715	1	1	0	0	11831	4	574	7	3	803	509	0.633873	0.000927821	0.00351539	0.00415099	0.00307135
	22	201044	961	110731	82443	7	898	24	1221	918	0	1	0	0	2295	1	666	6	1	569	302	0.530756	0.000846903	0.00376192	0.00418931	0.00311908
	23	246805	986	165528	72230	3	780	13	978	688	0	0	0	0	3910	1	907	1	1	491	288	0.586558	0.000984263	0.0034835	0.00427604	0.0018659
	24	148727	1350	76660	62648	18	1286	98	1047	854	0	0	0	0	2996	0	412	12	0	840	506	0.602381	0.000755376	0.00339524	0.00377645	0.00308619
	25	191571	1088	101738	80631	1	882	2	953	953	0	0	1	0	3336	1	1090	6	2	552	335	0.606884	0.00119127	0.00396293	0.00454815	0.00360457
	26	177487	686	99580	65573	5	542	1	663	577	0	0	0	0	8465	2	860	7	0	335	191	0.570149	0.00125088	0.00387401	0.00418017	0.00275262
	X	273239	1297	179570	79578	5	1172	20	1116	796	1	0	2	0	8191	2	602	9	3	534	341	0.638577	0.000404773	0.00185817	0.00213081	0.000944287
	Total	9522572	55538	5658683	3350899	287	48852	1286	51734	39976	21	17	18	3	232046	72	35340	267	86	29265	18182	0.621288	0.000892653	0.00338276	0.00395022	0.0023392
Note.―The SNP summary statistics of five native sheep breeds. The numbers in the parenthesis indicate the range of the numbers of SNPs per bp.

## Sheet: Table S7
Table S7. The SNP summary statistics of Ovis aries and Ovis orientalis
Breeds	Chr.	Total SNP	Downstream	Intergenic	Intronic	Splicing	Upstream	Upstream/Downstream	UTR3	UTR5	UTR5/UTR3	Exonic/Splicing_nonsynonymous	Exonic/Splicing_synonymous	ncRNA_exonic/splicing	ncRNA_intronic	ncRNA_splicing	ncRNA_exonic	exonic
																		Stop gain	Stop loss	Synonymous	Nonsynonymous	Ratio of nonsynonymous/synonymous	Numbers of SNPs per bp in exonic region	Numbers of SNPs per bp in intronic region	Numbers of SNPs per bp in intergenic region	Numbers of SNPs per bp in chromsome
Ovis aries	1	1489322	9404	875367	540226	21	7538	184	9964	6731	2	1	0	0	27607	6	4392	38	11	4735	3095	0.653643	0.00133587	0.00510131	0.00565081	0.00348735
	2	1345748	6910	766155	508756	24	5678	109	8187	6354	0	1	1	0	31273	10	5746	23	5	4187	2329	0.556246	0.0015046	0.0052728	0.00553659	0.00367651
	3	1192517	8339	679121	449290	18	6985	203	9080	6376	14	1	3	1	20883	7	4844	45	5	4573	2729	0.596764	0.00135568	0.00508646	0.00554096	0.00366577
	4	651661	3005	356598	267579	13	2484	62	3768	2512	28	0	0	0	10763	4	2314	12	6	1533	980	0.639269	0.00137842	0.00519487	0.00574032	0.00430734
	5	573309	5028	331075	186244	12	4485	117	4274	2950	2	0	2	0	32467	6	2219	35	5	2561	1827	0.713393	0.00141632	0.00504955	0.00553359	0.00311289
	6	683115	2708	423309	234127	9	2217	51	3236	2344	1	2	0	1	10786	4	1788	17	1	1513	1001	0.661599	0.00157617	0.00561533	0.00600163	0.00331943
	7	535073	3703	281777	220799	9	3021	113	4973	3347	0	2	1	2	11448	10	2298	18	7	2195	1350	0.615034	0.00135564	0.00499281	0.00573127	0.00449099
	8	501031	2258	298284	175831	10	1587	39	2879	1850	0	0	1	0	14675	3	1667	6	0	1247	694	0.556536	0.00146837	0.00534743	0.00567856	0.00334737
	9	527464	2363	339462	164481	3	1679	35	2384	1769	0	0	0	0	11699	3	1933	5	3	1034	611	0.590909	0.00155742	0.00526289	0.00577269	0.00279707
	10	489932	1733	337754	134925	6	1327	22	1736	1270	0	0	1	2	7817	3	1784	4	1	1022	525	0.513699	0.00181439	0.00518686	0.00592357	0.00236633
	11	321293	4420	151602	140213	9	3278	186	4647	2988	0	0	0	0	8357	5	1634	18	8	2594	1334	0.514264	0.00122465	0.00494198	0.00550386	0.00509038
	12	431235	2695	237287	170724	7	2008	81	3370	2544	24	0	1	0	7862	4	2035	16	3	1554	1020	0.656371	0.00146843	0.00511613	0.00579162	0.00416697
	13	440218	3148	238186	176287	15	2520	46	3201	2758	1	0	1	1	9389	2	2140	13	7	1622	881	0.543157	0.00136637	0.00517334	0.00545704	0.00403888
	14	315867	4350	170337	110892	16	3719	198	3833	3293	6	1	0	0	13485	4	1829	32	9	2146	1717	0.800093	0.00137401	0.00470439	0.00533013	0.00346999
	15	454650	4895	264074	155314	11	4493	72	3255	2336	1	0	2	0	14755	3	1629	23	15	2095	1677	0.800477	0.00167136	0.00521011	0.0058831	0.00346012
	16	418638	1696	265788	131174	4	1237	15	1640	1102	6	1	0	0	13019	4	1615	5	1	830	501	0.603614	0.00183682	0.00555068	0.00602578	0.00297389
	17	392942	2231	236844	137089	4	1587	32	2374	1852	0	0	0	0	7465	7	1493	7	0	1302	655	0.503072	0.00134689	0.00514264	0.00569671	0.00329735
	18	371718	2244	229187	119551	4	1711	140	1951	1532	0	0	0	0	11628	2	1902	10	2	1158	696	0.601036	0.00164933	0.00512075	0.005646	0.00294512
	19	322973	1845	137632	160380	6	1554	73	2247	2444	0	1	0	1	12813	4	2022	10	1	1248	692	0.554487	0.00135848	0.00518436	0.00570749	0.00665084
	20	279406	2730	157589	103514	5	2353	154	3063	2151	0	0	0	0	3852	1	1574	18	8	1421	973	0.684729	0.00154344	0.00513384	0.00572045	0.00375754
	21	279913	2628	141636	111397	8	2007	62	1689	1370	1	0	0	0	15938	5	1003	16	5	1315	833	0.63346	0.00155224	0.00527216	0.00595306	0.00468209
	22	287373	1707	151495	123580	5	1275	28	2178	1531	0	0	0	0	3046	2	993	11	0	953	569	0.597062	0.00138554	0.00562152	0.00573154	0.00467542
	23	346799	1560	221352	111729	6	1123	11	1874	1196	0	0	0	1	5247	2	1431	2	2	780	483	0.619231	0.00157319	0.0053518	0.00571813	0.00288627
	24	224918	2194	110767	98977	8	1864	157	2014	1596	0	0	0	0	4349	0	748	15	1	1405	823	0.585765	0.00127688	0.00534422	0.00545664	0.00487584
	25	263633	1620	135285	114277	2	1275	1	2013	1387	0	0	0	1	4728	1	1610	6	2	877	548	0.624857	0.00182621	0.00561659	0.00604786	0.0051087
	26	258394	979	141833	98033	5	791	12	1119	858	0	0	0	0	12563	5	1338	8	0	507	343	0.676529	0.00197196	0.00578689	0.00595387	0.00411523
	X	584866	3152	377446	177016	10	2592	48	3295	2186	2	0	2	2	15758	5	1183	16	6	1317	830	0.63022	0.000911215	0.00408125	0.00447884	0.0021005
	Total	13984008	89545	8057242	5122405	250	72388	2251	94244	68627	88	10	15	12	343672	112	55164	429	114	47724	29716	0.622664	0.00142957	0.00516068	0.0056246	0.00357585
Ovis orientalis	1	1701259	9923	1015867	603970	32	8579	187	10378	7297	6	1	2	0	31378	8	5102	68	10	5153	3298	0.640016	0.00148392	0.00570786	0.00655779	0.00389884
	2	1497543	7008	868207	552468	30	6120	117	8196	6589	1	2	1	1	35498	7	6328	35	6	4478	2451	0.547343	0.001628	0.00574085	0.00627407	0.00399239
	3	1368859	9007	801195	498260	35	7940	209	9369	6905	4	1	4	0	22204	8	5126	57	8	5296	3231	0.610083	0.00152486	0.00563052	0.00653697	0.00406532
	4	750474	3197	416645	303464	17	2880	55	3947	2763	7	0	0	0	12055	8	2496	25	5	1771	1139	0.643139	0.00154656	0.00588873	0.00670692	0.004885
	5	635562	5106	377146	197365	21	4933	132	4301	2963	1	0	1	1	36291	8	2351	31	5	2870	2036	0.709408	0.00155397	0.00539459	0.00630362	0.00329876
	6	758160	2859	475832	254205	15	2470	58	3356	2415	4	2	0	0	12216	5	2027	21	2	1630	1043	0.639877	0.00172321	0.00610846	0.00674629	0.00360409
	7	597635	3984	322621	239952	7	3595	91	4996	3578	0	2	0	0	12443	8	2577	22	7	2320	1432	0.617241	0.00146884	0.00542595	0.00656202	0.00488056
	8	552276	2367	330878	192648	8	1874	32	2842	1821	0	0	1	0	15760	7	1982	9	0	1352	695	0.514053	0.00164064	0.00584993	0.00629906	0.00366752
	9	625517	2553	408024	191093	1	2105	32	2343	2046	0	0	0	0	13269	6	2006	5	3	1284	747	0.581776	0.00175677	0.00610475	0.00693862	0.00324961
	10	586387	1927	412735	154006	7	1592	18	1962	1411	0	0	1	2	9034	1	1901	6	0	1170	614	0.524786	0.00200746	0.00592443	0.0072386	0.00270098
	11	343702	4462	168763	144169	16	3615	172	4444	3003	0	0	1	0	8999	4	1730	23	5	2831	1465	0.517485	0.00132678	0.00509492	0.00612688	0.005234
	12	509173	2984	283653	200000	11	2427	61	3406	2589	4	0	0	0	8839	3	2243	26	6	1816	1105	0.60848	0.00164865	0.00598282	0.0069233	0.00488153
	13	499350	3435	274938	195820	21	2943	52	3395	3159	1	1	0	1	10316	4	2347	17	8	1872	1020	0.544872	0.00154248	0.00574341	0.00629906	0.0044864
	14	342719	4635	187260	117548	25	4125	231	4154	3321	4	2	1	1	14702	5	2015	34	9	2651	1996	0.752923	0.00160696	0.00500218	0.00585968	0.00367827
	15	512355	5522	301125	170202	14	5527	58	3172	2709	0	1	0	0	17968	5	1785	29	15	2310	1913	0.828139	0.00185973	0.00576464	0.00670853	0.0037918
	16	469019	1698	302984	142801	5	1400	15	1713	1214	9	0	1	1	14081	3	1764	7	1	837	485	0.57945	0.00192518	0.00603915	0.00686906	0.00323749
	17	450171	2460	277183	152080	7	1829	33	2388	2008	1	1	0	1	8146	7	1600	15	0	1580	832	0.526582	0.00156897	0.00570018	0.00666697	0.00365792
	18	422064	2484	264864	131284	10	2026	114	1958	1677	0	1	0	1	13272	3	2155	12	2	1352	849	0.627959	0.00191284	0.00564294	0.00652489	0.00323417
	19	358925	2127	156760	175405	12	1765	76	2341	2597	0	0	0	1	13365	3	2211	14	1	1499	748	0.498999	0.00152945	0.00565064	0.00650072	0.00727391
	20	302497	2736	174112	109474	9	2521	113	2977	2172	0	0	0	0	4258	4	1704	16	7	1413	981	0.694268	0.00159252	0.00543823	0.00632024	0.00397389
	21	307490	2654	160476	118390	10	2273	54	1738	1367	1	0	0	0	17267	5	968	17	3	1384	883	0.638006	0.00159286	0.00561672	0.00674492	0.00497601
	22	338980	1799	184934	139838	6	1530	46	2305	1687	0	1	0	0	3950	3	1196	11	1	1067	606	0.567948	0.00158026	0.00638343	0.00699664	0.00529052
	23	390433	1658	258548	117198	4	1295	17	1725	1153	0	0	0	0	5886	2	1584	3	3	848	509	0.600236	0.00171838	0.00563125	0.006679	0.00302754
	24	246750	2299	124372	105775	14	2155	154	1994	1583	0	0	0	0	5055	1	786	22	0	1630	910	0.558282	0.00142881	0.00573234	0.00612686	0.00521073
	25	320766	1939	169071	135682	1	1561	5	1984	1760	0	0	1	0	5373	2	1767	11	2	993	614	0.618328	0.00203266	0.00665726	0.00755825	0.0060656
	26	284355	1180	157728	107107	9	889	4	1178	986	0	0	0	1	12906	5	1440	9	0	587	326	0.555366	0.00212103	0.00627963	0.00662111	0.00449614
	X	527123	2669	343809	155523	8	2136	31	2568	1875	2	0	1	1	15309	6	1276	14	4	1180	711	0.602542	0.000865817	0.00361671	0.0040797	0.00184546
	Total	15699544	273762	25334214	15850537	855	226881	6669	283618	209902	221	35	45	36	1067184	355	170795	1417	341	148622	92071	0.619498	0.00443692	0.0159725	0.0176853	0.011065
Note.―The SNP summary statistics of Ovis aries and Ovis orientalis. The numbers in the parenthesis indicate the range of the numbers of SNPs per bp.

## Sheet: Table S8
Table S8. Summary of indel calling in 5 Chinese native sheep breeds and Ovis orientalis.
Distrbution/type		Altay	Duolang	Hu	Mongolian	Tibetan	Ovis orientalis
UTR3		8719	8167	8563	8806	8594	14362
UTR5		5865	5679	5880	5982	5749	9557
UTR5/UTR3		3	4	5	3	2	10
Downstream		9539	8862	9502	9637	9382	14144
Exonic	frameshift_deletion	380	396	391	391	385	573
	frameshift_insertion	1405	1529	1447	1460	1425	1100
	nonframeshift_deletion	237	230	236	238	228	441
	nonframeshift_insertion	766	827	792	787	789	630
	stopgain	80	82	80	83	83	53
	stoploss	8	10	8	9	8	7
Exonic/Splicing	frameshift_deletion	7	7	7	7	7	6
	frameshift_insertion	39	40	38	40	36	28
	nonframeshift_insertion	15	19	18	19	19	11
	stopgain	3	4	4	4	4	4
Intergenic		719003	639969	707717	720643	699526	1072075
Intergenic/Intergenic		0	0	0	0	1	1
Intronic		463896	422171	458775	466620	452886	702858
ncRNA_UTR5		6	6	4	6	6	4
ncRNA_exonic		4726	4408	4699	4786	4620	7343
ncRNA_exonic/splicing		2	1	2	2	2	2
ncRNA_intronic		31200	27785	30557	31182	30236	46752
ncRNA_splicing		43	35	45	44	47	37
Splicing		332	361	355	351	351	293
Upstream		7977	7862	8075	8258	7946	11529
Upstream/Downstream		317	316	315	323	319	414
Upstream/Upstream		1	1	1	1	1	0
Total		1254569	1128771	1237516	1259682	1222652	1882234
Note.―Upstream, InDels within the 1 kb region upstream of the gene starting site; Downstream, InDels within the 1 kb region downstream of the gene ending site; Upstream/Downstream indicates that a InDel is located in downstream and upstream regions (possibly for two different genes); Splicing refers to a variant that is within 2 bp of a splice junction; Intergenic region, InDels within intergenic…

## Sheet: Table S9
Table S9. Ranking of 150-kb windows with top 1% Fst and Z(Fst) value in domestic sheep (Ovis aries)
Chromosome	Positon		Number of variants	Fst value	Z(Fst)	Gene ID		Gene name
	Start	End				Entirety	Partial
13	50400001	50550000	1092	0.862221	7.30895	101119578;100217410		RNF24;PANK2
20	50175001	50325000	1031	0.838949	7.0412	101102186	101101931	FOXC1;GMDS
13	50325001	50475000	1337	0.836236	7.00999	105606258	101119578	LOC105606258;RNF24
3	124650001	124800000	1713	0.833543	6.97901
20	50025001	50175000	828	0.80292	6.62669	105603912	101101931	LOC105603912;GMDS
24	41625001	41775000	989	0.801645	6.61202	101116448;106991898		FAM20C;LOC106991898
20	49950001	50100000	842	0.800179	6.59516	105603912	101101931	LOC105603912;GMDS
21	49650001	49800000	676	0.799854	6.59142	101105700;105604160;101106382;101105454;101106895;101104441;101106640;101106212;101104945;101105959		BET1L;LOC105604160;ATHL1;SIRT3;RIC8A;IFITM5;NLRP6;ODF3;PSMD13;SCGB1C1
13	50250001	50400000	1459	0.789374	6.47085	105606258		LOC105606258
3	124725001	124875000	1596	0.787694	6.45152
20	50100001	50250000	868	0.773947	6.29336		101101931	GMDS
18	32325001	32475000	1182	0.77325	6.28535	101106628;105603152;101118225;105603154;101106884;105603296;105603153;101106367		COMMD4;LOC105603152;MAN2C1;LOC105603154;C18H15orf39;LOC105603296;LOC105603153;NEIL1
15	80475001	80625000	873	0.773026	6.28277	101115988;101116508	106991631;101116255	LOC101115988;B3GAT1;LOC106991631;LOC101116255
6	116700001	116850000	1031	0.765663	6.19806	101108490;101108751;105613214;101108230;101111455	101107965;101109018	PDE6B;LOC101108751;LOC105613214;MFSD7;ATP5I;PCGF3;PIGG
18	23625001	23775000	1253	0.759926	6.13205
18	32250001	32400000	1044	0.758194	6.11213	101106628;105603152;101118225;105603296;101106112;101106367	105603153	COMMD4;LOC105603152;MAN2C1;LOC105603296;SIN3A;NEIL1;LOC105603153
19	60375001	60525000	326	0.752716	6.0491	101117883;106990579	101115319	CFAP100;LOC106990579;KLF15
10	37725001	37875000	1691	0.746961	5.98289
24	34575001	34725000	840	0.746627	5.97904	105604780;101101837;101101821;105604781	101120041	LOC105604780;TRNAG-CCC;TRNAE-UUC;LOC105604781;CUX1
2	122625001	122775000	1605	0.741634	5.92161		105608888	LOC105608888
24	34650001	34800000	800	0.737649	5.87576	105604780	101120041	LOC105604780;CUX1
2	115125001	115275000	1640	0.735963	5.85635	101117569		LOC101117569
2	115200001	115350000	1329	0.735402	5.8499	101117569		LOC101117569
13	53175001	53325000	628	0.735222	5.84784	101116851;100302308;100302028;101117606;105616789;101117096;101117352;101116591	101108850	ABHD16B;ARFRP1;ZGPAT;RTEL1;LIME1;ZBTB46;TNFRSF6B;TPD52L2;STMN3
20	49875001	50025000	921	0.73441	5.8385		101101931	GMDS
14	34350001	34500000	831	0.733084	5.82323	101115148;101108771;101115393;443052;101114297;101114044;101109037;101114893;106991595	101115644	ENKD1;RLTPR;C14H16orf86;ACTB;CTCF;FAM65A;ACD;PARD6A;LOC106991595;GFOD2
6	116400001	116550000	826	0.732472	5.8162	101106172;101111194;101106432;101106688		DGKQ;CPLX1;TMEM175;GAK
13	50175001	50325000	1156	0.728967	5.77587	101118975	100170316	SMOX;ADRA1D
15	47550001	47700000	1641	0.726062	5.74245	101105439;101105946;101105186;101105686;101106459;101106201;101104685;101104933;101104426	101106712;101104177	LOC101105439;LOC101105946;LOC101105186;LOC101105686;LOC101106459;LOC101106201;LOC101104685;LOC101104933;LOC101104426;LOC101106712;LOC101104177
6	116775001	116925000	727	0.725517	5.73618	101108751;105613214;101109018	101108490	LOC101108751;LOC105613214;PIGG;PDE6B
12	78750001	78900000	746	0.724667	5.7264	105610030;101113164;101113425	101112917	LOC105610030;IPO9;SHISA4;NAV1
6	115875001	116025000	880	0.722202	5.69804	106991222;554324;105608253	101103648	LOC106991222;FGFR3;LETM1;WHSC1
14	34425001	34575000	716	0.720899	5.68305	101115148;101108771;101115393;443052;101115644;101109037;101114893;101109296	101109559;101114297	ENKD1;RLTPR;C14H16orf86;ACTB;GFOD2;ACD;PARD6A;RANBP10;TSNAXIP1;CTCF
18	32175001	32325000	806	0.719978	5.67245	101106112;101105855		SIN3A;PTPN9
3	213225001	213375000	997	0.719857	5.67106	101102223;101102469;443298;105609492;101123544;101123285;101101972;101119130	101119389;105609488	LOC101102223;GCAT;LGALS1;LOC105609492;PDXP;SH3BP1;NOL12;LOC101119130;GALR3;LOC105609488
12	78675001	78825000	833	0.719416	5.66598	101112917	101113164	NAV1;IPO9
13	53250001	53400000	614	0.718724	5.65802	100302308;100302028;101109634;101117606;101118124;105616789;101117352;101109378;101108850;101117866;101109112	101109898;101117096	ARFRP1;ZGPAT;PPDPF;RTEL1;SRMS;LIME1;TNFRSF6B;PTK6;STMN3;GMEB2;C13H20orf195;EEF1A2;ZBTB46
20	15000001	15150000	1150	0.717691	5.64614	101105192;101108001;101105447;101104434;101104185;101108263	101103930	TREML1;LOC101108001;TREM2;NFYA;OARD1;TREML2;APOBEC2
1	54300001	54450000	1399	0.715529	5.62126	101110201;101103103;101103357;105613526;101110473	443366	LOC101110201;LOC101103103;IFI44L;LOC105613526;IFI44;PTGFR
3	124575001	124725000	1658	0.712819	5.59008		443371	KITLG
10	37650001	37800000	1284	0.712728	5.58904	105614068		LOC105614068
21	49575001	49725000	664	0.71269	5.58861	105604160;105604159;101105867;101106382;101104441;101104700;101106640	101104945	LOC105604160;LOC105604159;LOC101105867;ATHL1;IFITM5;IFITM3;NLRP6;PSMD13
12	78825001	78975000	856	0.712232	5.58333	101114205;101113949;105610031;105610030;101104676;101113425	101113164;105610032	RNPEP;TIMM17A;LOC105610031;LOC105610030;ELF3;SHISA4;IPO9;LOC105610032
15	80400001	80550000	968	0.707415	5.52791	101115988;101116508;106991631;101115732;101116255		LOC101115988;B3GAT1;LOC106991631;LOC101115732;LOC101116255
10	37800001	37950000	1719	0.704314	5.49224
13	49650001	49800000	1204	0.703887	5.48732	101110438		LOC101110438
13	49725001	49875000	1179	0.702875	5.47568
6	24675001	24825000	1416	0.700856	5.45246	443235;106990491;101110413;101109970	101110675	H2AFZ;LOC106990491;LAMTOR3;DNAJB14;DAPP1
2	115050001	115200000	1769	0.699345	5.43508
15	47625001	47775000	1991	0.697564	5.41458	101105439;101105946;101106712;101106966;101107469;101105686;101106459;101107221;101106201;101107731		LOC101105439;LOC101105946;LOC101106712;LOC101106966;LOC101107469;LOC101105686;LOC101106459;LOC101107221;LOC101106201;LOC101107731
12	78900001	79050000	808	0.696398	5.40117	101114205;101114718;101113949;105610031;101104676;100302316;101114457;105610032		RNPEP;LOC101114718;TIMM17A;LOC105610031;ELF3;ARL8A;GPR37L1;LOC105610032
6	116850001	117000000	260	0.695757	5.39379		101109018	PIGG
5	7575001	7725000	1034	0.695361	5.38923	101120077;101123297;101123554;105615346;101120324	101101981	EPHX3;LOC101123297;NOTCH3;LOC105615346;LOC101120324;LOC101101981
18	23700001	23850000	1100	0.69457	5.38014
10	70275001	70425000	564	0.69326	5.36506		101106781	LOC101106781
24	41700001	41850000	1056	0.688517	5.31049	101116448;106991898		FAM20C;LOC106991898
6	80025001	80175000	1730	0.688514	5.31046
5	51450001	51600000	800	0.68393	5.25772	105608313	101109966	LOC105608313;ARHGAP26
2	214275001	214425000	1363	0.683463	5.25235		101104375	SPAG16
2	219375001	219525000	571	0.683132	5.24854	443365;102465823;101110306;101110822;101110570	101111075	SLC11A1;MIR26B;CTDSP1;USP37;VIL1;RQCD1
13	53325001	53475000	820	0.679445	5.20612	101109898;101109634;101118124;101109378;101117866;101109112;101118630	101108850	EEF1A2;PPDPF;SRMS;PTK6;GMEB2;C13H20orf195;KCNQ2;STMN3
24	41850001	42000000	814	0.679077	5.20189	105604839		LOC105604839
1	27750001	27900000	1345	0.678733	5.19793		101117210	GLIS1
21	49425001	49575000	573	0.675405	5.15964	101105372;106991826;101104357;101105615;101104191;101104618;101107006;101105118		PKP3;LOC106991826;HRAS;B4GALNT4;SIGIRR;RNH1;PTDSS2;ANO9
3	18150001	18300000	1555	0.674961	5.15454	101102303	101116033	LOC101102303;MBOAT2
21	49500001	49650000	659	0.674858	5.15335	101105372;105604159;101105867;101105615;101104700;101104191;101105118		PKP3;LOC105604159;LOC101105867;B4GALNT4;IFITM3;SIGIRR;ANO9
3	213150001	213300000	1127	0.67397	5.14314	443298;105609492;101123025;105609489;101123544;101123285;101122773;105609488;101101972;101118867	101119130	LGALS1;LOC105609492;GGA1;LOC105609489;PDXP;SH3BP1;CDC42EP1;LOC105609488;NOL12;LGALS2;LOC101119130
3	18075001	18225000	1405	0.673822	5.14143	101116033	101115774	MBOAT2;KIDINS220
13	50475001	50625000	1110	0.673791	5.14108	101119838;105606256;100217410	101119578	MAVS;LOC105606256;PANK2;RNF24
24	41925001	42075000	459	0.670847	5.1072
20	15075001	15225000	1568	0.670094	5.09854	101105695;101105192;101105447;101108263	101108001	TREM1;TREML1;TREM2;TREML2;LOC101108001
4	47475001	47625000	1276	0.668962	5.08552
10	31875001	32025000	1266	0.666766	5.06025		443088	FLT1
6	79950001	80100000	1802	0.666476	5.05692	106991226		LOC106991226
20	50850001	51000000	929	0.666252	5.05434	101102433;105603919	101111234	DUSP22;LOC105603919;IRF4
6	116625001	116775000	908	0.664791	5.03753	101107965;105601929;101108230;101107198;101107446;101111455;101108322	101108490	PCGF3;LOC105601929;MFSD7;UVSSA;MAEA;ATP5I;LOC101108322;PDE6B
9	36000001	36150000	1109	0.664124	5.02985	101116061;101115630;101108760;100135683		CHCHD7;PLAG1;MOS;RPS20
13	53100001	53250000	608	0.663873	5.02697	101116851;101116077;101108591;101116591;101108330;101116335	101108070;101117096	ABHD16B;SAMD10;DNAJC5;TPD52L2;ZNF512B;UCKL1;PRPF6;ZBTB46
24	41550001	41700000	1065	0.661964	5.00501	106991921;101115933;106991923;106991922	105604883	LOC106991921;DNAAF5;LOC106991923;LOC106991922;LOC105604883
6	116325001	116475000	626	0.661877	5.004	101105916;101106172;101106432;101105659;105613208	101106688	IDUA;DGKQ;TMEM175;FGFRL1;LOC105613208;GAK
24	10350001	10500000	1123	0.658718	4.96767	105604663;101108359;101109932;101109666		LOC105604663;TXNDC11;ZC3H7A;SNN
18	19200001	19350000	1388	0.658512	4.96529	101121632;105603084;101102268;101122387;101121378;105603293;101122139;101121887		LOC101121632;LOC105603084;LOC101102268;LOC101122387;LOC101121378;LOC105603293;LOC101122139;LOC101121887
3	124425001	124575000	1535	0.658098	4.96052		443371	KITLG
1	54375001	54525000	1176	0.657607	4.95488	101110473	101103357	IFI44;IFI44L
18	45450001	45600000	1329	0.657199	4.95019	101121204;106991745;106991744		NKX2-1;LOC106991745;LOC106991744
20	50775001	50925000	959	0.656522	4.94239	101111234	101102433;101110975	IRF4;DUSP22;EXOC2
24	32625001	32775000	1072	0.656082	4.93733	101113297;780489;101101823	101112784	GTF2I;NCF1;TRNAC-ACA;LOC101112784
4	23700001	23850000	1264	0.655978	4.93614		101103313	AGMO
6	81525001	81675000	1186	0.655113	4.92618
18	32475001	32625000	1194	0.654713	4.92159	101107138;101118994		PPCDC;SCAMP5
17	53475001	53625000	654	0.654539	4.91958	101104013;101103842	101103267;101104093	P2RX4;P2RX7;CAMKK2;IFT81
5	106950001	107100000	1245	0.653804	4.91112	105615337		LOC105615337
24	34725001	34875000	669	0.65322	4.90441		101120041	CUX1
17	64950001	65100000	2031	0.65287	4.90038	780513;101104345	101117366;101117110	CRYBB3;CRYBB2;ADRBK2;KIAA1671
20	50700001	50850000	829	0.651577	4.8855		101111234;101110975	IRF4;EXOC2
3	94425001	94575000	1379	0.651359	4.883	106991063	101111176	LOC106991063;EXOC6B
21	49350001	49500000	518	0.650721	4.87566	101103856;101104106;101103935;106991826;101104357;101103683;101104618;101103608;101107006	101103359	LMNTD2;LRRC56;RASSF7;LOC106991826;HRAS;IRF7;RNH1;PHRF1;PTDSS2;CDHR5
13	53400001	53550000	1052	0.650225	4.86994	105616725;101110163;101110435;101118889;101118630	101109898	COL20A1;ARFGAP1;BIRC7;CHRNA4;KCNQ2;EEF1A2
18	23550001	23700000	1181	0.649952	4.86681	101107903		MEX3B
6	116475001	116625000	934	0.648229	4.84699	101111194;105615565	101106688	CPLX1;LOC105615565;GAK
6	44625001	44775000	1566	0.647788	4.84191	101105658;101105914		ZCCHC4;ANAPC4
13	49575001	49725000	1170	0.647538	4.83903	101110438		LOC101110438
13	53025001	53175000	484	0.647132	4.83436	101108070;101116077;105616722;101108591;101115815;101107810;105616788;101108330;101116335;101115560	101107542	PRPF6;SAMD10;SOX18;DNAJC5;TCEA2;RGS19;LOC105616788;ZNF512B;UCKL1;LKAAEAR1;OPRL1
13	49800001	49950000	1078	0.646822	4.8308		101118465	HAO1
4	45975001	46125000	1159	0.646268	4.82442
8	12225001	12375000	1306	0.642549	4.78163		101117511	TRMT11
18	32400001	32550000	1125	0.64176	4.77256	105603154;101106884	105603153	LOC105603154;C18H15orf39;LOC105603153
10	35400001	35550000	964	0.641568	4.77035
3	124500001	124650000	1611	0.64145	4.769		443371	KITLG
5	7500001	7650000	929	0.641444	4.76893	101120077;101123297;105615346;101119815	101119556	EPHX3;LOC101123297;LOC105615346;AKAP8;AKAP8L
18	65925001	66075000	745	0.639618	4.74792	101121973		RCOR1
14	34275001	34425000	619	0.638134	4.73085	443530;443269;105606370;101114044;106991595;101108509	101114297;101108247	HSD11B2;AGRP;LOC105606370;FAM65A;LOC106991595;ATP6V0D1;CTCF;ZDHHC1
6	24600001	24750000	1636	0.638111	4.73058	106990491		LOC106990491
10	70350001	70500000	701	0.637892	4.72806		101106781;101107030	LOC101106781;LOC101107030
10	37575001	37725000	1282	0.637309	4.72135	105614068		LOC105614068
2	51225001	51375000	587	0.63714	4.7194		101108453	ZCCHC7
10	41775001	41925000	1662	0.635915	4.70531
6	115950001	116100000	691	0.635744	4.70335	106990166;106991247;101104663;105608252;101104153;106991222;554324;105608253		LOC106990166;LOC106991247;SLBP;TMEM129;LOC101104153;LOC106991222;FGFR3;LETM1
17	52725001	52875000	923	0.635511	4.70066	101102760;101102267;101102515;105602872	101121971;101103013	MLXIP;B3GNT4;LRRC43;LOC105602872;DIABLO;BCL7A
17	53550001	53700000	718	0.633959	4.68281		101104093;101103842	IFT81;P2RX7
12	78975001	79125000	307	0.633477	4.67726	101114718;100302316;101114457	105610032	LOC101114718;ARL8A;GPR37L1;LOC105610032
2	51300001	51450000	703	0.632741	4.6688		101108453;101108719	ZCCHC7;PAX5
20	50925001	51075000	600	0.631705	4.65688	105603919	101102433	LOC105603919;DUSP22
18	32550001	32700000	967	0.63075	4.64589	101107138;101107901;101107390;101107636;100170667;101118994	101108166	PPCDC;MPI;RPP25;FAM219B;COX5A;SCAMP5;SCAMP2
6	79875001	80025000	1818	0.629532	4.63187	106991226		LOC106991226
6	24750001	24900000	1453	0.629108	4.627	443235;101110675;101110413;101109970		H2AFZ;DAPP1;LAMTOR3;DNAJB14
6	115800001	115950000	861	0.628304	4.61774	101103156;101103648;101102905;101103399	101102646	LOC101103156;WHSC1;NAT8L;NELFA;POLN
18	66000001	66150000	882	0.627389	4.60723	101121973	100036758	RCOR1;TRAF3
2	122325001	122475000	1802	0.62736	4.60689	101122056	101121155	LOC101122056;FSIP2
2	234375001	234525000	891	0.626385	4.59567	101115686;101105986;101116887;101115942;105601905;101115435;106990972;101117141;101115189;101116209	100216439;101117566	EIF3I;IQCC;TXLNA;TMEM234;CCDC28B;LOC101115435;LOC106990972;KPNA6;FAM167B;DCDC2B;LCK;TMEM39B
4	63000001	63150000	1268	0.625695	4.58774	105612117		LOC105612117
12	78600001	78750000	659	0.625643	4.58713	106991464	101112664;101112917	LOC106991464;LOC101112664;NAV1
5	106875001	107025000	1401	0.624219	4.57075		101107280	SLC25A46
3	162150001	162300000	1338	0.623965	4.56783	105612238;101104222;101104649;101104897		LOC105612238;LOC101104222;SDR9C7;LOC101104897
2	219450001	219600000	534	0.623652	4.56422	101111344;101111075	101110822;101111263	PLCD4;RQCD1;USP37;ZNF142
4	111750001	111900000	1145	0.622086	4.54621	101121510;106991146;101108126		ZNF777;LOC106991146;ZNF746
9	30825001	30975000	1485	0.621377	4.53805	101110341;101110602		LOC101110341;LOC101110602
6	116025001	116175000	824	0.620309	4.52577	106990166;106991247;101104663;105608252;101104153		LOC106990166;LOC106991247;SLBP;TMEM129;LOC101104153
9	25350001	25500000	1060	0.619327	4.51447	106990507		LOC106990507
24	41775001	41925000	876	0.618875	4.50927	105604839		LOC105604839
15	37200001	37350000	1003	0.618542	4.50544	100170328;105602235		CALCB;LOC105602235
11	24675001	24825000	1251	0.61654	4.48241	101104161;101103655;100302359;105610740;101103406;105616325;105610748;101112994;101103905	101104412;101112746	MED31;XAF1;TXNDC17;LOC105610740;FBXO39;LOC105616325;LOC105610748;LOC101112994;SLC13A5;KIAA0753;SMTNL2
2	122700001	122850000	1900	0.616069	4.47698
2	122250001	122400000	1666	0.615892	4.47495	101122056		LOC101122056
8	67200001	67350000	1275	0.615693	4.47266		101101994	HIVEP2
2	115875001	116025000	1389	0.61305	4.44225	105608728	105610849	LOC105608728;LOC105610849
17	52350001	52500000	1040	0.612752	4.43882	101102014;101120018	101120274	LOC101102014;KNTC1;RSRC2
17	52125001	52275000	831	0.612668	4.43786	101123071;101123327;101119252	101123584;101118989	VPS37B;HIP1R;ABCB9;CCDC62;OGFOD2
2	37275001	37425000	708	0.612078	4.43107	101102619	101103036	UBAP2;UBE2R2
2	234300001	234450000	759	0.611855	4.4285	100216439;101115686;101105986;101116887;101115942;101114681;100820752;105601905;101115435;106990972;101105729;101115189;101114422;101116209	101113659;101117141	LCK;EIF3I;IQCC;TXLNA;TMEM234;FAM229A;HDAC1;CCDC28B;LOC101115435;LOC106990972;MARCKSL1;FAM167B;TSSK3;DCDC2B;BSDC1;KPNA6
13	51600001	51750000	1113	0.611015	4.41884	105606246;101113000;101113781;105606248;101103413;101113260		EBF4;TMEM239;LOC101113781;LOC105606248;CPXM1;C13H20orf141
20	50250001	50400000	1393	0.609645	4.40308	101102186;101101794	101101931	FOXC1;TRNAS-GGA;GMDS
21	1	150000	731	0.609285	4.39894	101118394		PANX1
13	51375001	51525000	510	0.609017	4.39585	101102326;101101909		LOC101102326;PTPRA
5	51375001	51525000	989	0.608472	4.38958	105608313	101109966	LOC105608313;ARHGAP26
2	71175001	71325000	952	0.608204	4.3865		101111519	RFX3
6	37275001	37425000	957	0.608014	4.38432	105615456	101104320	LOC105615456;LCORL
18	45375001	45525000	1578	0.605752	4.35829	106991744	106991745	LOC106991744;LOC106991745
1	119400001	119550000	703	0.605534	4.35578	101120123;101120370		SLC5A3;MRPS6
18	22650001	22800000	951	0.604003	4.33817	101107140		BNC1
11	51150001	51300000	912	0.60387	4.33663		101120424;101119737;101119998	RNF213;NPTX1;ENDOV
19	23175001	23325000	1442	0.603585	4.33336		101112093	CNTN4
5	78525001	78675000	1269	0.603487	4.33223	101118188;106990145;101122436;105606738	101118446	ACOT12;LOC106990145;ZCCHC9;LOC105606738;SSBP2
24	10275001	10425000	1141	0.603062	4.32735	101109666	101108359	SNN;TXNDC11
4	27300001	27450000	1192	0.602954	4.3261		100642178	HDAC9
2	114975001	115125000	1421	0.601509	4.30948
22	41100001	41250000	1033	0.601153	4.30538	101101854	101110806	HTRA1;PLEKHA1
2	71100001	71250000	955	0.600795	4.30126		101111519	RFX3
2	234450001	234600000	803	0.600166	4.29402	101117566;101117825	101117141	TMEM39B;KHDRBS1;KPNA6
13	52950001	53100000	673	0.600083	4.29307	101107542;101107300;105616722;101115815;101107810;105616788;101115560	101108070;105616721	OPRL1;NPBWR2;SOX18;TCEA2;RGS19;LOC105616788;LKAAEAR1;PRPF6;LOC105616721
17	52425001	52575000	935	0.599976	4.29183	101120274;101120863	101121120;101120018	RSRC2;ZCCHC8;CLIP1;KNTC1
9	36075001	36225000	1209	0.599015	4.28078	101116323;101116061;100302354	101115630	LOC101116323;CHCHD7;SDR16C5;PLAG1
20	49800001	49950000	1089	0.599013	4.28076		101101931	GMDS
21	450001	600000	1053	0.598607	4.27609	101119170;101106726;101118909	101106980;101106473	TAF1D;MED17;C21H11orf54;CEP295;VSTM5
6	80100001	80250000	1603	0.598319	4.27277
10	37500001	37650000	1370	0.598144	4.27077
20	10800001	10950000	1636	0.597623	4.26476	105603679;101121978;101122471;101122225;101102940	101103192	LOC105603679;PPIL1;PI16;C20H6orf89;MTCH1;FGD2
6	36150001	36300000	792	0.597396	4.26216	101103321	101119562	HERC6;HERC5
4	69900001	70050000	930	0.596385	4.25052	102465810;101107436		MIR148A;LOC101107436
2	72525001	72675000	957	0.595426	4.23949	105608020;101113654	101113201;105608018	LOC105608020;RCL1;AK3;LOC105608018
2	123150001	123300000	1277	0.595312	4.23818
11	55125001	55275000	800	0.595213	4.23704	101110157;101110856;101121951;101111302;101110428;101121694;101121439;100217405	101109893;101122203	MRPS7;NUP85;NT5C;HN1;GGA3;SUMO2;MIF4GD;SLC25A19;GRB2;ARMC7
5	107025001	107175000	1225	0.59446	4.22838	105615337		LOC105615337
3	101925001	102075000	1250	0.593699	4.21962	101107774;105614680;101108208	101107510	LIPT1;LOC105614680;TSGA10;MITD1
3	111300001	111450000	1749	0.591681	4.1964
3	44850001	45000000	501	0.591635	4.19588	101116465;101119462;106990982	101119202;101116893	OTX1;LOC101119462;LOC106990982;WDPCP;EHBP1
1	27675001	27825000	1298	0.590283	4.18033	101117210	101116952	GLIS1;DMRTB1
23	60750001	60900000	825	0.590166	4.17897	101118578	101118324	KIAA1468;PIGN
24	14100001	14250000	1714	0.589755	4.17424	101114664	101114409	FOPNL;MYH11
18	65850001	66000000	758	0.589715	4.17378	105603272		ANKRD9
2	123225001	123375000	1366	0.589634	4.17286
2	115275001	115425000	1357	0.589363	4.16974		105608719	LOC105608719
4	78825001	78975000	1640	0.588545	4.16032		101119637	GLI3
13	51525001	51675000	793	0.587941	4.15337	101103001;101113000;105606248;101102580;101103413;101113260	105606246	PCED1A;TMEM239;LOC105606248;VPS16;CPXM1;C13H20orf141;EBF4
11	40050001	40200000	674	0.587822	4.152	101108501;101107536;106991426;101108762;101107973	101107294	GJD3;CDC6;LOC106991426;TOP2A;RARA;WIPF2
15	47475001	47625000	1660	0.586995	4.14249	101106199;101105186;101103422;101104685;101104933;101104177;101105945;101104426;101103180;101103921;101103670	101105685	LOC101106199;LOC101105186;LOC101103422;LOC101104685;LOC101104933;LOC101104177;LOC101105945;LOC101104426;LOC101103180;LOC101103921;LOC101103670;LOC101105685
13	42000001	42150000	927	0.586865	4.141	101105348;101107038;101105590	100302068	LOC101105348;FAM208B;ASB13;GDI2
2	71025001	71175000	849	0.586661	4.13865		101111519	RFX3
1	140325001	140475000	1163	0.586621	4.13819		101117463	NRIP1
6	116100001	116250000	818	0.586594	4.13788	101104910		CTBP1
5	78300001	78450000	1530	0.586575	4.13766	106991160	101121934	LOC106991160;RASGRF2
13	42075001	42225000	1381	0.585238	4.12228	101105590;101105840	101107038;101106096	ASB13;LOC101105840;FAM208B;NET1
18	14850001	15000000	1848	0.58519	4.12173	101101833	101120867	TRNAS-GCU;SV2B
20	17025001	17175000	682	0.583025	4.09682	101114564;101114821;101115833;101115579;101115320;101115071;101113443	101116098	YIPF3;POLR1C;MAD2L1BP;GTPBP2;POLH;XPO5;LRRC73;RSPH9
13	56250001	56400000	862	0.582952	4.09598	101114458;105616728	105606224	EDN3;LOC105616728;ZNF831
24	36150001	36300000	954	0.582675	4.09279	102465808;101107493;105604793;101123178;106991893;101107250;106990099;101110990;101107757;101108015;102465992	101111419	MIR106B;CNPY4;LOC105604793;TAF6;LOC106991893;MBLAC1;COPS6;ZNF3;AP4M1;MCM7;MIR25;ZKSCAN1
11	10725001	10875000	1319	0.582368	4.08926		101107292;101107879	INTS2;BRIP1
17	33000001	33150000	1619	0.582074	4.08588	101101922		LOC101101922
11	55050001	55200000	894	0.581919	4.0841	101110157;101109893;101110428;101121439;100217405	101110856	MRPS7;GRB2;GGA3;MIF4GD;SLC25A19;NUP85
6	19875001	20025000	1747	0.581168	4.07546	105611776	101104749;101104996	LOC105611776;PPA2;TET2
8	89400001	89550000	1387	0.580873	4.07206
18	55275001	55425000	1211	0.580303	4.0655	101112679	101112425;101112927	TC2N;CATSPERB;FBLN5
18	19275001	19425000	1401	0.579452	4.05571	101122633;101122387;101102516;101122139;101121887		LOC101122633;LOC101122387;LOC101102516;LOC101122139;LOC101121887
4	47550001	47700000	1180	0.579412	4.05525
24	34800001	34950000	578	0.579385	4.05493		101120041	CUX1
10	35475001	35625000	970	0.578446	4.04413	101116844		FGF9
3	87300001	87450000	1205	0.578408	4.0437		101122183	LOC101122183
2	218400001	218550000	1294	0.577346	4.03148	105606769		LOC105606769
5	78450001	78600000	1306	0.577207	4.02989	106990145;101122436;101122189	101118188;101121934;105606738	LOC106990145;ZCCHC9;CKMT2;ACOT12;RASGRF2;LOC105606738
2	122550001	122700000	1088	0.575216	4.00698	105608888	101121155	LOC105608888;FSIP2
2	71250001	71400000	940	0.574857	4.00284		101111519	RFX3
12	78375001	78525000	661	0.57467	4.0007	101111647;101111382;105616627	101111113;101112151	CSRP1;LOC101111382;LOC105616627;LOC101111113;TNNI1
1	7275001	7425000	1004	0.574163	3.99486	101112442	101105037	DGKD;SAG
18	1125001	1275000	1196	0.573723	3.98979	105603013	101114216	LOC105603013;LOC101114216
5	78375001	78525000	1353	0.573698	3.98951	106991160;101122189	101121934	LOC106991160;CKMT2;RASGRF2
6	116250001	116400000	685	0.573683	3.98934	101105916;101105160;101105412;105615562;105615563;101105659;105613208		IDUA;SPON2;LOC101105412;LOC105615562;LOC105615563;FGFRL1;LOC105613208
11	55200001	55350000	904	0.57294	3.98079	101101836;101101831;101122963;101122710;101121951;101111302;101122203;100217408;101121694;101122452;101101828	101110856	TRNAG-UCC;TRNAR-CCU;KCTD2;LOC101122710;NT5C;HN1;ARMC7;ATP5H;SUMO2;SLC16A5;TRNAR-UCG;NUP85
4	63075001	63225000	1388	0.571771	3.96734	105612117	101118868	LOC105612117;BBS9
8	89325001	89475000	1437	0.571311	3.96205
4	47625001	47775000	1166	0.570088	3.94797
2	122925001	123075000	1616	0.569227	3.93807
10	7725001	7875000	1596	0.569137	3.93704
3	124350001	124500000	1585	0.568786	3.933		443371	KITLG
10	35700001	35850000	573	0.568489	3.92958	105611671;101117678;105611673;101117428;101117089;101117597;101117344	101117172;101117941	LOC105611671;LOC101117678;LOC105611673;MRPL57;ZDHHC20;SAP18;SKA3;MICU2;LATS2
3	44775001	44925000	623	0.567958	3.92347	101119462;106990982	101119202	LOC101119462;LOC106990982;WDPCP
6	116175001	116325000	729	0.567925	3.9231	101105160;101105412;105615562;105615563;101104910		SPON2;LOC101105412;LOC105615562;LOC105615563;CTBP1
1	50775001	50925000	1036	0.567886	3.92265	101107567	101107837	LHX8;SLC44A5
3	42675001	42825000	1343	0.567304	3.91595		101117408	SPRED2
20	51000001	51150000	230	0.566527	3.907
3	111375001	111525000	1529	0.566297	3.90437	105611141		LOC105611141
17	44550001	44700000	700	0.565455	3.89467	101112347;105602840;101112597	101117449	NOC4L;LOC105602840;DDX51;EP400
9	37800001	37950000	808	0.56433	3.88173		101117675	TOX
2	122400001	122550000	1305	0.563956	3.87743		101121155	FSIP2
10	75150001	75300000	1213	0.563423	3.87129	105616225	101110423	LOC105616225;DOCK9
20	15150001	15300000	1631	0.563405	3.87109	105603703;101105695		LOC105603703;TREM1
2	72600001	72750000	1289	0.562953	3.8659	105608020;105608018	101113654	LOC105608020;LOC105608018;RCL1
22	22050001	22200000	524	0.562537	3.8611	101114741;101107917;101107649;443119	101107150	FBXL15;CUEDC2;PSD;NFKB2;GBF1
4	23775001	23925000	1184	0.562511	3.8608		101103313	AGMO
11	27375001	27525000	800	0.562273	3.85807	101107368;101107111;106990100;101108063;101122962;101123477;101123219;105607805;101107803	101108583;101122709	SLC25A35;RANGRF;RPL26;KRBA2;PFAS;ODF4;LOC101123219;LOC105607805;ARHGEF15;NDEL1;CTC1
20	16575001	16725000	838	0.56172	3.85171	101112931;101113441;105603708;101112265;101113180;101110885;101111134;101112683;101111668;101111400	101110884;101111135	CUL7;KLC4;LOC105603708;KLHDC3;MRPL2;PPP2R5D;GNMT;RRP36;MEA1;PEX6;CNPY3;PTK7
13	49950001	50100000	843	0.561573	3.85002		101118465	HAO1
7	72525001	72675000	1175	0.560866	3.84188	105615745	101107792	LOC105615745;PPP2R5E
12	78150001	78300000	900	0.560692	3.83988	101110859	105616625;101114341	LOC101110859;LOC105616625;SYT2
18	45150001	45300000	1493	0.560512	3.83781		106991743	LOC106991743
17	52050001	52200000	782	0.560153	3.83368	101122815;101118989;101119252	101123071;101118730	ARL6IP4;OGFOD2;ABCB9;VPS37B;PITPNM2
1	119475001	119625000	826	0.560131	3.83343		101120123;101120370	SLC5A3;MRPS6
10	31800001	31950000	1265	0.559505	3.82623		443088	FLT1
18	66225001	66375000	789	0.558599	3.81579	105603273;101104348;101122467		LOC105603273;LOC101104348;CDC42BPB
19	23250001	23400000	1347	0.557461	3.80271		101112093	CNTN4
3	97800001	97950000	1442	0.55735	3.80143
8	30750001	30900000	800	0.557325	3.80114	105611043;105611045	100913169;101121017	LOC105611043;LOC105611045;ATG5;PRDM1
15	225001	375000	513	0.557005	3.79746	105614142;106990761;105614369		LOC105614142;LOC106990761;LOC105614369
3	124800001	124950000	1284	0.55687	3.7959
12	78225001	78375000	792	0.556482	3.79144	101104415;106990232;105616625	101110859;101111113	UBE2T;LOC106990232;LOC105616625;LOC101110859;LOC101111113
15	47700001	47850000	2134	0.556401	3.79051	101109299;101106966;101107469;101108513;101108252;101109040;101107221;106990501;101107731;101108775	101106712	LOC101109299;LOC101106966;LOC101107469;LOC101108513;LOC101108252;LOC101109040;LOC101107221;LOC106990501;LOC101107731;LOC101108775;LOC101106712
5	107100001	107250000	1150	0.555991	3.78579
17	45450001	45600000	1476	0.555546	3.78068
10	19200001	19350000	1327	0.555352	3.77845	101115803	101116064;101115550	CAB39L;SETDB2;CDADC1
3	162075001	162225000	1226	0.555007	3.77448	105612238;101104222;101102890;105612239;443213;101103963;101103709		LOC105612238;LOC101104222;MYO1A;LOC105612239;TAC3;GPR182;ZBTB39
4	47700001	47850000	1026	0.554892	3.77315	101102639		LOC101102639
3	97875001	98025000	1407	0.553589	3.75815
4	101550001	101700000	924	0.553237	3.75411		101103641	AKR1D1
2	123000001	123150000	1612	0.552491	3.74553
12	42300001	42450000	1146	0.552388	3.74434	105606441;105606442;105606440	101114124;443507	LOC105606441;LOC105606442;GPR157;H6PD;SLC2A5
18	45075001	45225000	1571	0.552338	3.74377	101104531;101104787	106991743	LOC101104531;LOC101104787;LOC106991743
16	70800001	70950000	820	0.552158	3.7417	105602658;101110620;101110090;101110363	101109828	LOC105602658;TRIP13;TPPP;BRD9;CEP72
13	49050001	49200000	1135	0.551971	3.73954	101110166;101118207		LOC101110166;LOC101118207
3	42750001	42900000	1508	0.551418	3.73318		101112965;101117408	ACTR2;SPRED2
4	85575001	85725000	1431	0.551076	3.72925	106991137	101102975	LOC106991137;CPED1
17	52200001	52350000	1038	0.550878	3.72697	101123327;101123584;101119506;101119758	101123071	HIP1R;CCDC62;DENR;HCAR1;VPS37B
24	10425001	10575000	1444	0.55085	3.72664	105604663;101110471;101109932	101110724;101108359	LOC105604663;RSL1D1;ZC3H7A;GSPT1;TXNDC11
25	17400001	17550000	902	0.550822	3.72632		101121486	C25H10orf107
5	75675001	75825000	1238	0.550249	3.71974
2	232875001	233025000	770	0.550162	3.71873	106990892	101108891	LOC106990892;DIS3L2
18	22725001	22875000	864	0.549999	3.71686	101107140		BNC1
11	27300001	27450000	757	0.549469	3.71075	101107368;101106860;101107111;101101820;101122451;101101785;101122962;101101800;101106184;100174984;101123219;101106602;101122709	106991397;101107803	SLC25A35;AURKB;RANGRF;TRNAD-GUC;VAMP2;TRNAI-AAU;PFAS;TRNAP-CGG;TMEM107;PER1;LOC101123219;BORCS6;CTC1;LOC106991397;ARHGEF15
15	34500001	34650000	1400	0.549159	3.70719	101114384;101120522;101114135	101120271	NCR3LG1;ABCC8;KCNJ11;USH1C
23	56850001	57000000	1243	0.548532	3.69997	101114994	101115248	ONECUT2;FECH
5	1	150000	604	0.548287	3.69716	101116985		LOC101116985
13	49875001	50025000	1031	0.547877	3.69245	101118465		HAO1
1	50850001	51000000	1385	0.547667	3.69002		101107837	SLC44A5
10	35325001	35475000	793	0.547533	3.68848	105609559		LOC105609559
1	20475001	20625000	725	0.547497	3.68808	101102099;101102347;101101845	101123247;101102597	POMGNT1;LURAP1;TSPAN1;PIK3R3;RAD54L
19	49575001	49725000	671	0.54737	3.68661	101119259;101118996	101114650;101114910	CISH;MAPKAPK3;DOCK3;HEMK1
16	31275001	31425000	1154	0.54723	3.685	101122553;780500	101122307;101122979	C16H5orf28;CCL28;C16H5orf34;HMGCS1
13	49125001	49275000	1320	0.547186	3.6845
13	51450001	51600000	556	0.546596	3.67771	101103001;101102580	101101909	PCED1A;VPS16;PTPRA
20	16725001	16875000	664	0.546457	3.67611	101111402;101111670;101114062	101111916;101111135	SRF;DNPH1;CUL9;TTBK1;PTK7
6	53550001	53700000	1517	0.54594	3.67016
3	94350001	94500000	964	0.545519	3.66531	105607898;106991063	101111176	LOC105607898;LOC106991063;EXOC6B
2	122475001	122625000	913	0.545201	3.66165		105608888;101121155	LOC105608888;FSIP2
18	32100001	32250000	951	0.545049	3.65991	101105604;101117969;101105855	101105362	SNUPN;IMP3;PTPN9;SNX33
9	30750001	30900000	1438	0.544824	3.65732	101110341		LOC101110341
24	14175001	14325000	1666	0.542833	3.63441	101114664	101114409;101110991	FOPNL;MYH11;ABCC1
13	23325001	23475000	1449	0.542501	3.63059	101114127	101113873	OTUD1;C13H10orf67
10	31950001	32100000	1004	0.542365	3.62903		443088;101113862	FLT1;PAN3
17	52275001	52425000	1187	0.542123	3.62625	101102014;101119506;101119758	101120018;101123584	LOC101102014;DENR;HCAR1;KNTC1;CCDC62
14	34500001	34650000	424	0.542041	3.6253	101109559;101101793;101109824;101110083;101116419;101109296;101116165;101115894	101115644;101116671	TSNAXIP1;TRNAS-AGA;THAP11;EDC4;NRN1L;RANBP10;NUTF2;CENPT;GFOD2;PSKH1
18	29325001	29475000	1070	0.541865	3.62328	101114142;101113889;101101796	101114393	ADAMTS7;LOC101113889;TRNAS-CGA;TBC1D2B
4	45900001	46050000	1452	0.541584	3.62004
11	24600001	24750000	1222	0.541372	3.6176	101103655;101103164;101102912;105610740;101103406;101112746;105610748;101112994	101112494	XAF1;TEKT1;GGT6;LOC105610740;FBXO39;SMTNL2;LOC105610748;LOC101112994;MYBBP1A
2	90075001	90225000	1111	0.540959	3.61285	101107414		DMRTA1
1	266475001	266625000	1606	0.540908	3.61226	101109068;101116195	101115929	CLDN14;CHAF1B;MORC3
3	45075001	45225000	887	0.540619	3.60894		101116893	EHBP1
23	33375001	33525000	1283	0.540572	3.6084	101121138	101121561	RIOK3;TMEM241
19	22050001	22200000	1072	0.54047	3.60722	105603431	105603432	LOC105603431;LOC105603432
5	107325001	107475000	737	0.540423	3.60668	106991207;105615338	101108308;101107787	LOC106991207;LOC105615338;CAMK4;WDR36
18	55200001	55350000	1145	0.539897	3.60063		101112425	CATSPERB
15	2850001	3000000	1714	0.539202	3.59263
2	219525001	219675000	567	0.538618	3.58591	101111607;101111344;101112198;101112457;101111263	101111075;101112884	LOC101111607;PLCD4;RNF25;STK36;ZNF142;RQCD1;TTLL4
4	47400001	47550000	1312	0.538273	3.58195
13	51300001	51450000	663	0.537953	3.57826	101112753;443477;101112501;101102326;443390	101123317;101101909	GNRH2;AVP;MRPS26;LOC101102326;OXT;UBOX5;PTPRA
13	17100001	17250000	979	0.537703	3.57539	105613289	101122455;100125358	LOC105613289;CCNY;CREM
4	85650001	85800000	1343	0.5375	3.57306		101102975	CPED1
21	6975001	7125000	1879	0.537119	3.56867	101123080		LOC101123080
20	16650001	16800000	715	0.536062	3.55651	101111402;101113441;105603708;101113180;101111135	101112931;101114062	SRF;KLC4;LOC105603708;MRPL2;PTK7;CUL7;CUL9

## Sheet: Table S10
Table S10. Ranking of 150-kb windows with top 1% Hp and Z(Hp) value in domestic sheep (Ovis aries)
Chromosome	Positon		Number of variants	Hp value	Z(Hp)	Gene ID		Gene name
	Start	End				Entirety	Partial
15	80775001	80925000	19	0.0277872	-6.15998		101114465	LOC101114465
13	50400001	50550000	629	0.046289	-5.75541	101119578;100217410		RNF24;PANK2
19	1	150000	341	0.0465874	-5.74888	105603320;101122388;105603319	101122140	LOC105603320;MRPS24;LOC105603319;LOC101122140
20	50175001	50325000	513	0.0491602	-5.69262	101102186	101101931	FOXC1;GMDS
21	49650001	49800000	353	0.0573379	-5.51381	101105700;105604160;101106382;101105454;101106895;101104441;101106640;101106212;101104945;101105959		BET1L;LOC105604160;ATHL1;SIRT3;RIC8A;IFITM5;NLRP6;ODF3;PSMD13;SCGB1C1
3	124650001	124800000	546	0.0584138	-5.49028
20	50100001	50250000	463	0.0595866	-5.46463		101101931	GMDS
6	116700001	116850000	791	0.0603756	-5.44738	101108490;101108751;105613214;101108230;101111455	101107965;101109018	PDE6B;LOC101108751;LOC105613214;MFSD7;ATP5I;PCGF3;PIGG
13	50325001	50475000	768	0.060676	-5.44081	105606258	101119578	LOC105606258;RNF24
18	32325001	32475000	744	0.0647857	-5.35095	101106628;105603152;101118225;105603154;101106884;105603296;105603153;101106367		COMMD4;LOC105603152;MAN2C1;LOC105603154;C18H15orf39;LOC105603296;LOC105603153;NEIL1
2	214275001	214425000	774	0.0652024	-5.34183		101104375	SPAG16
12	78675001	78825000	594	0.0656612	-5.3318	101112917	101113164	NAV1;IPO9
20	49875001	50025000	564	0.066324	-5.31731		101101931	GMDS
19	60375001	60525000	261	0.0666566	-5.31004	101117883;106990579	101115319	CFAP100;LOC106990579;KLF15
5	107400001	107550000	384	0.0677457	-5.28622	105615338	101108308	LOC105615338;CAMK4
20	15000001	15150000	614	0.0688306	-5.2625	101105192;101108001;101105447;101104434;101104185;101108263	101103930	TREML1;LOC101108001;TREM2;NFYA;OARD1;TREML2;APOBEC2
12	78975001	79125000	195	0.0700304	-5.23626	101114718;100302316;101114457	105610032	LOC101114718;ARL8A;GPR37L1;LOC105610032
5	107325001	107475000	461	0.0701667	-5.23328	106991207;105615338	101108308;101107787	LOC106991207;LOC105615338;CAMK4;WDR36
5	107475001	107625000	368	0.0726272	-5.17948		101108308	CAMK4
18	32250001	32400000	678	0.0731516	-5.16801	101106628;105603152;101118225;105603296;101106112;101106367	105603153	COMMD4;LOC105603152;MAN2C1;LOC105603296;SIN3A;NEIL1;LOC105603153
21	49575001	49725000	380	0.0735542	-5.15921	105604160;105604159;101105867;101106382;101104441;101104700;101106640	101104945	LOC105604160;LOC105604159;LOC101105867;ATHL1;IFITM5;IFITM3;NLRP6;PSMD13
3	45000001	45150000	427	0.0747952	-5.13207		101116893	EHBP1
3	124725001	124875000	633	0.074928	-5.12917
12	78750001	78900000	477	0.0752213	-5.12276	105610030;101113164;101113425	101112917	LOC105610030;IPO9;SHISA4;NAV1
6	116400001	116550000	571	0.075263	-5.12184	101106172;101111194;101106432;101106688		DGKQ;CPLX1;TMEM175;GAK
5	51450001	51600000	444	0.0765277	-5.09419	105608313	101109966	LOC105608313;ARHGAP26
13	53175001	53325000	478	0.0770048	-5.08376	101116851;100302308;100302028;101117606;105616789;101117096;101117352;101116591	101108850	ABHD16B;ARFRP1;ZGPAT;RTEL1;LIME1;ZBTB46;TNFRSF6B;TPD52L2;STMN3
24	41625001	41775000	635	0.0770595	-5.08256	101116448;106991898		FAM20C;LOC106991898
20	49950001	50100000	577	0.0780168	-5.06163	105603912	101101931	LOC105603912;GMDS
15	80700001	80850000	188	0.0782715	-5.05606	101114465		LOC101114465
20	50025001	50175000	550	0.0786903	-5.0469	105603912	101101931	LOC105603912;GMDS
3	44925001	45075000	268	0.0792423	-5.03483	101116465	101116893	OTX1;EHBP1
13	53100001	53250000	462	0.0812364	-4.99123	101116851;101116077;101108591;101116591;101108330;101116335	101108070;101117096	ABHD16B;SAMD10;DNAJC5;TPD52L2;ZNF512B;UCKL1;PRPF6;ZBTB46
12	78900001	79050000	523	0.0816493	-4.9822	101114205;101114718;101113949;105610031;101104676;100302316;101114457;105610032		RNPEP;LOC101114718;TIMM17A;LOC105610031;ELF3;ARL8A;GPR37L1;LOC105610032
13	50250001	50400000	913	0.0821474	-4.9713	105606258		LOC105606258
6	116775001	116925000	509	0.0822977	-4.96802	101108751;105613214;101109018	101108490	LOC101108751;LOC105613214;PIGG;PDE6B
2	219375001	219525000	290	0.0823455	-4.96697	443365;102465823;101110306;101110822;101110570	101111075	SLC11A1;MIR26B;CTDSP1;USP37;VIL1;RQCD1
5	107625001	107775000	324	0.082369	-4.96646		101108308;101108571	CAMK4;STARD4
3	61725001	61875000	637	0.082795	-4.95714	101109087;101116816	101109349;101116555	CCDC138;RANBP2;EDAR;LIMS1
5	107550001	107700000	304	0.0829526	-4.9537		101108308	CAMK4
21	49425001	49575000	356	0.0831633	-4.94909	101105372;106991826;101104357;101105615;101104191;101104618;101107006;101105118		PKP3;LOC106991826;HRAS;B4GALNT4;SIGIRR;RNH1;PTDSS2;ANO9
6	116325001	116475000	494	0.0833591	-4.94481	101105916;101106172;101106432;101105659;105613208	101106688	IDUA;DGKQ;TMEM175;FGFRL1;LOC105613208;GAK
6	116850001	117000000	194	0.0843461	-4.92323		101109018	PIGG
12	78825001	78975000	566	0.0844635	-4.92066	101114205;101113949;105610031;105610030;101104676;101113425	101113164;105610032	RNPEP;TIMM17A;LOC105610031;LOC105610030;ELF3;SHISA4;IPO9;LOC105610032
12	78600001	78750000	532	0.085276	-4.90289	106991464	101112664;101112917	LOC106991464;LOC101112664;NAV1
6	1	150000	436	0.08529	-4.90259		101112139	LOC101112139
3	44850001	45000000	229	0.0853725	-4.90078	101116465;101119462;106990982	101119202;101116893	OTX1;LOC101119462;LOC106990982;WDPCP;EHBP1
3	45075001	45225000	470	0.0859798	-4.8875		101116893	EHBP1
2	112275001	112425000	382	0.0863295	-4.87986		101102287	OCA2
20	50850001	51000000	486	0.0880705	-4.84179	101102433;105603919	101111234	DUSP22;LOC105603919;IRF4
20	50775001	50925000	451	0.0885425	-4.83146	101111234	101102433;101110975	IRF4;DUSP22;EXOC2
18	23625001	23775000	723	0.0888915	-4.82383
21	49500001	49650000	409	0.089491	-4.81073	101105372;105604159;101105867;101105615;101104700;101104191;101105118		PKP3;LOC105604159;LOC101105867;B4GALNT4;IFITM3;SIGIRR;ANO9
2	112350001	112500000	324	0.0895359	-4.80974		101102287;101102534	OCA2;LOC101102534
15	47550001	47700000	1067	0.0905407	-4.78777	101105439;101105946;101105186;101105686;101106459;101106201;101104685;101104933;101104426	101106712;101104177	LOC101105439;LOC101105946;LOC101105186;LOC101105686;LOC101106459;LOC101106201;LOC101104685;LOC101104933;LOC101104426;LOC101106712;LOC101104177
2	219450001	219600000	307	0.0909252	-4.77936	101111344;101111075	101110822;101111263	PLCD4;RQCD1;USP37;ZNF142
21	37425001	37575000	403	0.0913227	-4.77067	105604082	100034671;443375;101102598;101103278	LOC105604082;PAG11;PAG3;LOC101102598;LOC101103278
5	107250001	107400000	512	0.0919579	-4.75678	106991207;101107787		LOC106991207;WDR36
10	37725001	37875000	887	0.0925271	-4.74433
13	53025001	53175000	345	0.0933732	-4.72583	101108070;101116077;105616722;101108591;101115815;101107810;105616788;101108330;101116335;101115560	101107542	PRPF6;SAMD10;SOX18;DNAJC5;TCEA2;RGS19;LOC105616788;ZNF512B;UCKL1;LKAAEAR1;OPRL1
19	59625001	59775000	690	0.093412	-4.72499	101114819;101114563;105603609;105603608;105603631;100913154	101115319	SLC41A3;ZXDC;LOC105603609;LOC105603608;LOC105603631;ALDH1L1;KLF15
1	24675001	24825000	239	0.093832	-4.7158		101108967	FAF1
18	19200001	19350000	1303	0.0942248	-4.70721	101121632;105603084;101102268;101122387;101121378;105603293;101122139;101121887		LOC101121632;LOC105603084;LOC101102268;LOC101122387;LOC101121378;LOC105603293;LOC101122139;LOC101121887
10	37800001	37950000	774	0.0945929	-4.69916
3	106350001	106500000	349	0.0946765	-4.69733
1	27750001	27900000	846	0.0947082	-4.69664		101117210	GLIS1
10	35400001	35550000	765	0.0949845	-4.6906
6	115950001	116100000	439	0.0951316	-4.68738	106990166;106991247;101104663;105608252;101104153;106991222;554324;105608253		LOC106990166;LOC106991247;SLBP;TMEM129;LOC101104153;LOC106991222;FGFR3;LETM1
6	24675001	24825000	952	0.0952786	-4.68417	443235;106990491;101110413;101109970	101110675	H2AFZ;LOC106990491;LAMTOR3;DNAJB14;DAPP1
11	51150001	51300000	580	0.0959998	-4.6684		101120424;101119737;101119998	RNF213;NPTX1;ENDOV
11	27000001	27150000	197	0.0960935	-4.66635	101105262;101120178;101105010;101104764;101120679;101104509;101120425;101119918;101119656	101104254	TRAPPC1;LOC101120178;LOC101105010;NAA38;CNTROB;TMEM88;KCNAB3;CHD3;KDM6B;DNAH2
2	112425001	112575000	249	0.0961161	-4.66585		101102287;101102534	OCA2;LOC101102534
21	49350001	49500000	354	0.0968244	-4.65037	101103856;101104106;101103935;106991826;101104357;101103683;101104618;101103608;101107006	101103359	LMNTD2;LRRC56;RASSF7;LOC106991826;HRAS;IRF7;RNH1;PHRF1;PTDSS2;CDHR5
18	32175001	32325000	491	0.0968697	-4.64938	101106112;101105855		SIN3A;PTPN9
16	70725001	70875000	525	0.097915	-4.62652	101109828;101110090;101110363	101110620	CEP72;TPPP;BRD9;TRIP13
3	18075001	18225000	822	0.0979573	-4.62559	101116033	101115774	MBOAT2;KIDINS220
2	111375001	111525000	403	0.0981392	-4.62162	105608664	101122922;101122664	LOC105608664;MFSD14B;ANXA10
20	50700001	50850000	394	0.0981448	-4.62149		101111234;101110975	IRF4;EXOC2
18	22650001	22800000	626	0.0982303	-4.61962	101107140		BNC1
6	116250001	116400000	556	0.098456	-4.61469	101105916;101105160;101105412;105615562;105615563;101105659;105613208		IDUA;SPON2;LOC101105412;LOC105615562;LOC105615563;FGFRL1;LOC105613208
3	106275001	106425000	271	0.098529	-4.61309	101120071;106990993		LOC101120071;LOC106990993
18	1125001	1275000	702	0.0987746	-4.60772	105603013	101114216	LOC105603013;LOC101114216
5	107175001	107325000	600	0.0988309	-4.60649		101107787	WDR36
3	124425001	124575000	1044	0.0993292	-4.5956		443371	KITLG
24	34575001	34725000	606	0.100024	-4.58041	105604780;101101837;101101821;105604781	101120041	LOC105604780;TRNAG-CCC;TRNAE-UUC;LOC105604781;CUX1
13	49725001	49875000	797	0.100409	-4.57199
5	7575001	7725000	717	0.100819	-4.56301	101120077;101123297;101123554;105615346;101120324	101101981	EPHX3;LOC101123297;NOTCH3;LOC105615346;LOC101120324;LOC101101981
5	107100001	107250000	799	0.101771	-4.54219
24	34650001	34800000	494	0.102307	-4.53048	105604780	101120041	LOC105604780;CUX1
3	18150001	18300000	1093	0.102518	-4.52587	101102303	101116033	LOC101102303;MBOAT2
2	112500001	112650000	278	0.102697	-4.52196		101102534	LOC101102534
6	116025001	116175000	549	0.103934	-4.49491	106990166;106991247;101104663;105608252;101104153		LOC106990166;LOC106991247;SLBP;TMEM129;LOC101104153
1	24750001	24900000	248	0.103937	-4.49484		101108967	FAF1
3	44775001	44925000	289	0.104207	-4.48894	101119462;106990982	101119202	LOC101119462;LOC106990982;WDPCP
13	53400001	53550000	780	0.10448	-4.48297	105616725;101110163;101110435;101118889;101118630	101109898	COL20A1;ARFGAP1;BIRC7;CHRNA4;KCNQ2;EEF1A2
18	66000001	66150000	572	0.105555	-4.45947	101121973	100036758	RCOR1;TRAF3
9	25350001	25500000	522	0.105637	-4.45767	106990507		LOC106990507
20	50925001	51075000	346	0.105673	-4.45688	105603919	101102433	LOC105603919;DUSP22
10	37575001	37725000	515	0.105742	-4.45538	105614068		LOC105614068
5	107700001	107850000	329	0.10599	-4.44995	101108571	101108308	STARD4;CAMK4
10	37650001	37800000	636	0.106163	-4.44616	105614068		LOC105614068
15	80475001	80625000	436	0.106277	-4.44368	101115988;101116508	106991631;101116255	LOC101115988;B3GAT1;LOC106991631;LOC101116255
24	10350001	10500000	676	0.106682	-4.43482	105604663;101108359;101109932;101109666		LOC105604663;TXNDC11;ZC3H7A;SNN
6	115875001	116025000	501	0.106863	-4.43085	106991222;554324;105608253	101103648	LOC106991222;FGFR3;LETM1;WHSC1
2	112200001	112350000	271	0.107041	-4.42696		101102287	OCA2
17	61800001	61950000	142	0.107051	-4.42675	101116258;101115734;101115991;101110970	101116511;101110707;105602913	MAPKAPK5;LOC101115734;LOC101115991;LOC101110970;ALDH2;TMEM116;LOC105602913
16	70650001	70800000	577	0.108194	-4.40175	494437	101109828;101103266	SLC9A3;CEP72;EXOC3
3	105300001	105450000	515	0.10847	-4.39571	105611977	105611978	LOC105611977;LOC105611978
2	219525001	219675000	359	0.108505	-4.39495	101111607;101111344;101112198;101112457;101111263	101111075;101112884	LOC101111607;PLCD4;RNF25;STK36;ZNF142;RQCD1;TTLL4
13	53250001	53400000	458	0.10852	-4.39462	100302308;100302028;101109634;101117606;101118124;105616789;101117352;101109378;101108850;101117866;101109112	101109898;101117096	ARFRP1;ZGPAT;PPDPF;RTEL1;SRMS;LIME1;TNFRSF6B;PTK6;STMN3;GMEB2;C13H20orf195;EEF1A2;ZBTB46
6	44700001	44850000	1150	0.108796	-4.38859	101105914	101105658	ANAPC4;ZCCHC4
6	116475001	116625000	663	0.10933	-4.3769	101111194;105615565	101106688	CPLX1;LOC105615565;GAK
20	15075001	15225000	1021	0.11032	-4.35526	101105695;101105192;101105447;101108263	101108001	TREM1;TREML1;TREM2;TREML2;LOC101108001
13	56250001	56400000	529	0.110537	-4.35052	101114458;105616728	105606224	EDN3;LOC105616728;ZNF831
18	23700001	23850000	601	0.110682	-4.34735
24	41925001	42075000	293	0.110976	-4.34091
18	65925001	66075000	495	0.111381	-4.33207	101121973		RCOR1
6	116625001	116775000	745	0.111507	-4.32931	101107965;105601929;101108230;101107198;101107446;101111455;101108322	101108490	PCGF3;LOC105601929;MFSD7;UVSSA;MAEA;ATP5I;LOC101108322;PDE6B
12	78375001	78525000	537	0.111861	-4.32156	101111647;101111382;105616627	101111113;101112151	CSRP1;LOC101111382;LOC105616627;LOC101111113;TNNI1
18	32550001	32700000	601	0.111993	-4.31868	101107138;101107901;101107390;101107636;100170667;101118994	101108166	PPCDC;MPI;RPP25;FAM219B;COX5A;SCAMP5;SCAMP2
10	31875001	32025000	743	0.112064	-4.31714		443088	FLT1
3	213225001	213375000	677	0.113391	-4.28811	101102223;101102469;443298;105609492;101123544;101123285;101101972;101119130	101119389;105609488	LOC101102223;GCAT;LGALS1;LOC105609492;PDXP;SH3BP1;NOL12;LOC101119130;GALR3;LOC105609488
13	49650001	49800000	864	0.113424	-4.2874	101110438		LOC101110438
20	49800001	49950000	674	0.113432	-4.28721		101101931	GMDS
11	27375001	27525000	503	0.113618	-4.28314	101107368;101107111;106990100;101108063;101122962;101123477;101123219;105607805;101107803	101108583;101122709	SLC25A35;RANGRF;RPL26;KRBA2;PFAS;ODF4;LOC101123219;LOC105607805;ARHGEF15;NDEL1;CTC1
13	50475001	50625000	749	0.114639	-4.26083	101119838;105606256;100217410	101119578	MAVS;LOC105606256;PANK2;RNF24
13	50175001	50325000	753	0.114702	-4.25945	101118975	100170316	SMOX;ADRA1D
18	45450001	45600000	825	0.11474	-4.2586	101121204;106991745;106991744		NKX2-1;LOC106991745;LOC106991744
24	34725001	34875000	383	0.114839	-4.25644		101120041	CUX1
2	115125001	115275000	1221	0.114908	-4.25493	101117569		LOC101117569
3	106425001	106575000	231	0.115261	-4.24722
2	111450001	111600000	463	0.115273	-4.24695	105608664	101122922	LOC105608664;MFSD14B
11	55200001	55350000	632	0.116032	-4.23036	101101836;101101831;101122963;101122710;101121951;101111302;101122203;100217408;101121694;101122452;101101828	101110856	TRNAG-UCC;TRNAR-CCU;KCTD2;LOC101122710;NT5C;HN1;ARMC7;ATP5H;SUMO2;SLC16A5;TRNAR-UCG;NUP85
14	62550001	62700000	61	0.116302	-4.22446	105602113;101121964		LOC105602113;LOC101121964
11	40050001	40200000	334	0.116523	-4.21963	101108501;101107536;106991426;101108762;101107973	101107294	GJD3;CDC6;LOC106991426;TOP2A;RARA;WIPF2
2	214350001	214500000	653	0.116853	-4.21241		101104375	SPAG16
6	79875001	80025000	1372	0.117	-4.20919	106991226		LOC106991226
10	37500001	37650000	581	0.117308	-4.20247
1	20550001	20700000	291	0.117357	-4.20138	101102851;101102347;101112107;101103101;100270719;101102597	101102099	LOC101102851;LURAP1;LRRC41;NSUN4;UQCRH;RAD54L;POMGNT1
4	69900001	70050000	618	0.117493	-4.1984	102465810;101107436		MIR148A;LOC101107436
2	218400001	218550000	919	0.117602	-4.19604	105606769		LOC105606769
2	234375001	234525000	507	0.118327	-4.18017	101115686;101105986;101116887;101115942;105601905;101115435;106990972;101117141;101115189;101116209	100216439;101117566	EIF3I;IQCC;TXLNA;TMEM234;CCDC28B;LOC101115435;LOC106990972;KPNA6;FAM167B;DCDC2B;LCK;TMEM39B
2	111675001	111825000	330	0.118375	-4.17914	101123441	101123184	LOC101123441;LOC101123184
5	18825001	18975000	232	0.118833	-4.16912	101121773;101121852;101121516;101122026;101121598;101121261	101122105	AMH;AP3D1;PLEKHJ1;IZUMO4;SF3A2;DOT1L;MOB3A
2	111750001	111900000	405	0.119043	-4.16451	101116291		LOC101116291
5	7500001	7650000	610	0.119333	-4.15818	101120077;101123297;105615346;101119815	101119556	EPHX3;LOC101123297;LOC105615346;AKAP8;AKAP8L
6	80025001	80175000	1309	0.119381	-4.15712
24	41700001	41850000	745	0.119385	-4.15704	101116448;106991898		FAM20C;LOC106991898
2	71250001	71400000	622	0.119769	-4.14864		101111519	RFX3
3	105225001	105375000	662	0.119914	-4.14548	105611977	105611978	LOC105611977;LOC105611978
1	118350001	118500000	471	0.120206	-4.13909	101118149;101117714		SFT2D2;TIPRL
15	80625001	80775000	325	0.120927	-4.12332		101114465	LOC101114465
20	16575001	16725000	483	0.122066	-4.09843	101112931;101113441;105603708;101112265;101113180;101110885;101111134;101112683;101111668;101111400	101110884;101111135	CUL7;KLC4;LOC105603708;KLHDC3;MRPL2;PPP2R5D;GNMT;RRP36;MEA1;PEX6;CNPY3;PTK7
3	61650001	61800000	501	0.122323	-4.0928	101116555	101108824;101116816	LIMS1;GCC2;RANBP2
8	67200001	67350000	738	0.122678	-4.08502		101101994	HIVEP2
11	62100001	62250000	221	0.122846	-4.08135	106991443;105610541;105610540		LOC106991443;LOC105610541;LOC105610540
19	49575001	49725000	449	0.123096	-4.07589	101119259;101118996	101114650;101114910	CISH;MAPKAPK3;DOCK3;HEMK1
2	111525001	111675000	374	0.123171	-4.07425	105612222;105612221	101122922;101123184	LOC105612222;LOC105612221;MFSD14B;LOC101123184
13	52950001	53100000	499	0.12321	-4.0734	101107542;101107300;105616722;101115815;101107810;105616788;101115560	101108070;105616721	OPRL1;NPBWR2;SOX18;TCEA2;RGS19;LOC105616788;LKAAEAR1;PRPF6;LOC105616721
5	51375001	51525000	580	0.123417	-4.06888	105608313	101109966	LOC105608313;ARHGAP26
4	47550001	47700000	845	0.123681	-4.0631
1	7275001	7425000	699	0.1239	-4.05831	101112442	101105037	DGKD;SAG
5	106950001	107100000	880	0.124684	-4.04116	105615337		LOC105615337
7	99600001	99750000	696	0.124739	-4.03997	101120412;101116236;106991295	101116484;101115969	CTDSPL2;EIF3J;LOC106991295;SPG11;LOC101115969
5	106875001	107025000	1078	0.124889	-4.03669		101107280	SLC25A46
23	60750001	60900000	556	0.124923	-4.03595	101118578	101118324	KIAA1468;PIGN
12	53025001	53175000	513	0.125577	-4.02165	101113947;101112996;101113256;101113689	101114203;101116848	LOC101113947;LOC101112996;KLHL20;CENPL;DARS2;ANKRD45
5	41400001	41550000	254	0.125784	-4.01712	105615257;101117249;101117762;101116987;101117506;105607079;105615362;105607082	101119982	LOC105615257;REXO1;ADAT3;ATP8B3;ABHD17A;KLF16;LOC105615362;ONECUT3;SCAMP4
2	71175001	71325000	676	0.125917	-4.0142		101111519	RFX3
1	200850001	201000000	293	0.12638	-4.00409	101120127;100125625;101121054;101119867;101121650;494441;101107661;443243;101119601;101120791;106990878	106990879	FAM131A;CLCN2;ECE2;POLR2H;ALG3;EIF4G1;VWA5B2;CHRD;THPO;PSMD2;CAMK2N2;LOC106990879
6	116175001	116325000	543	0.126946	-3.99172	101105160;101105412;105615562;105615563;101104910		SPON2;LOC101105412;LOC105615562;LOC105615563;CTBP1
12	49500001	49650000	338	0.126998	-3.99056	101108327;101107808;101108068;101108588;101109375;105609731	101108848;101109109	SAMD11;PLEKHN1;KLHL17;ZBTB17;NOC2L;LOC105609731;SPEN;PERM1
24	14100001	14250000	1176	0.12717	-3.98681	101114664	101114409	FOPNL;MYH11
6	79950001	80100000	1490	0.127442	-3.98085	106991226		LOC106991226
20	17025001	17175000	413	0.127775	-3.97357	101114564;101114821;101115833;101115579;101115320;101115071;101113443	101116098	YIPF3;POLR1C;MAD2L1BP;GTPBP2;POLH;XPO5;LRRC73;RSPH9
3	106500001	106650000	191	0.128167	-3.96501
2	111600001	111750000	278	0.128381	-3.96033	105612222;101123441;101123184;105612221	101122922	LOC105612222;LOC101123441;LOC101123184;LOC105612221;MFSD14B
15	80400001	80550000	480	0.128591	-3.95574	101115988;101116508;106991631;101115732;101116255		LOC101115988;B3GAT1;LOC106991631;LOC101115732;LOC101116255
2	115050001	115200000	1109	0.128872	-3.94958
13	53325001	53475000	617	0.128881	-3.9494	101109898;101109634;101118124;101109378;101117866;101109112;101118630	101108850	EEF1A2;PPDPF;SRMS;PTK6;GMEB2;C13H20orf195;KCNQ2;STMN3
22	41100001	41250000	641	0.12892	-3.94855	101101854	101110806	HTRA1;PLEKHA1
8	12225001	12375000	934	0.129094	-3.94474		101117511	TRMT11
24	32625001	32775000	674	0.129109	-3.94442	101113297;780489;101101823	101112784	GTF2I;NCF1;TRNAC-ACA;LOC101112784
2	234300001	234450000	438	0.1295	-3.93586	100216439;101115686;101105986;101116887;101115942;101114681;100820752;105601905;101115435;106990972;101105729;101115189;101114422;101116209	101113659;101117141	LCK;EIF3I;IQCC;TXLNA;TMEM234;FAM229A;HDAC1;CCDC28B;LOC101115435;LOC106990972;MARCKSL1;FAM167B;TSSK3;DCDC2B;BSDC1;KPNA6
4	101475001	101625000	635	0.129671	-3.93212	101103641	101108743	AKR1D1;CREB3L2
6	24750001	24900000	958	0.129692	-3.93167	443235;101110675;101110413;101109970		H2AFZ;DAPP1;LAMTOR3;DNAJB14
1	118275001	118425000	394	0.129982	-3.92532		101117126;101117714	GPR161;TIPRL
13	51600001	51750000	823	0.13095	-3.90416	105606246;101113000;101113781;105606248;101103413;101113260		EBF4;TMEM239;LOC101113781;LOC105606248;CPXM1;C13H20orf141
24	41850001	42000000	523	0.131038	-3.90222	105604839		LOC105604839
13	21975001	22125000	390	0.131896	-3.88347		101102829;101113089	DNAJC1;MLLT10
3	10950001	11100000	628	0.131984	-3.88153	101112387;102465814;105611269		OLFML2A;MIR181A-2;LOC105611269
9	13500001	13650000	428	0.132374	-3.87301	101115285;105612922;101110421;105615980;105612923;105612924;101113599;101112655;101109368;101113157;101109888;101115548;100126245;101109624;101110150		SHARPIN;LOC105612922;HGH1;LOC105615980;LOC105612923;LOC105612924;LOC101113599;GPAA1;HSF1;MAF1;MROH1;EXOSC4;DGAT1;BOP1;LOC101110150
21	37500001	37650000	298	0.132456	-3.87122	101104024;105604082;101102598;106990744	100034671	LOC101104024;LOC105604082;LOC101102598;LOC106990744;PAG11
9	94575001	94725000	11	0.13262	-3.86763
3	106875001	107025000	537	0.132622	-3.86758	101119291		TSPAN8
4	45975001	46125000	789	0.133042	-3.85842
4	47475001	47625000	984	0.133113	-3.85685
8	82800001	82950000	462	0.13328	-3.8532	101112740;106991323;106991303	443500	SLC22A1;LOC106991323;LOC106991303;IGF2R
6	44625001	44775000	1130	0.13332	-3.85233	101105658;101105914		ZCCHC4;ANAPC4
18	32475001	32625000	736	0.133426	-3.85001	101107138;101118994		PPCDC;SCAMP5
10	34050001	34200000	650	0.133502	-3.84836	105616172;101116065;101115885		LOC105616172;MTMR6;NUP58
17	50925001	51075000	565	0.13353	-3.84773	105602860;101115905	101121042	LOC105602860;LOC101115905;NCOR2
6	19875001	20025000	1324	0.134091	-3.83548	105611776	101104749;101104996	LOC105611776;PPA2;TET2
18	45375001	45525000	939	0.134285	-3.83123	106991744	106991745	LOC106991744;LOC106991745
3	94425001	94575000	1100	0.134551	-3.8254	106991063	101111176	LOC106991063;EXOC6B
8	89400001	89550000	1007	0.134664	-3.82293
24	14025001	14175000	849	0.134751	-3.82104	101114156	101110728;101114409	NDE1;KIAA0430;MYH11
20	16650001	16800000	410	0.134866	-3.81852	101111402;101113441;105603708;101113180;101111135	101112931;101114062	SRF;KLC4;LOC105603708;MRPL2;PTK7;CUL7;CUL9
18	65850001	66000000	501	0.134985	-3.81592	105603272		ANKRD9
15	47625001	47775000	1305	0.134993	-3.81575	101105439;101105946;101106712;101106966;101107469;101105686;101106459;101107221;101106201;101107731		LOC101105439;LOC101105946;LOC101106712;LOC101106966;LOC101107469;LOC101105686;LOC101106459;LOC101107221;LOC101106201;LOC101107731
18	19275001	19425000	1322	0.135096	-3.8135	101122633;101122387;101102516;101122139;101121887		LOC101122633;LOC101122387;LOC101102516;LOC101122139;LOC101121887
5	107025001	107175000	859	0.135245	-3.81024	105615337		LOC105615337
13	51375001	51525000	328	0.135397	-3.8069	101102326;101101909		LOC101102326;PTPRA
4	63000001	63150000	899	0.135692	-3.80045	105612117		LOC105612117
3	106575001	106725000	213	0.13587	-3.79656	101121085		LOC101121085
2	111825001	111975000	346	0.136053	-3.79256	101116291	101102038	LOC101116291;LGSN
3	105375001	105525000	562	0.136113	-3.79125		105611978	LOC105611978
15	37200001	37350000	531	0.136116	-3.79118	100170328;105602235		CALCB;LOC105602235
10	26325001	26475000	170	0.136375	-3.78553		101107611	NBEA
1	24825001	24975000	288	0.136639	-3.77976		101108967	FAF1
13	49125001	49275000	754	0.136946	-3.77305
4	118575001	118725000	1087	0.136963	-3.77267		101118691	NCAPG2
13	49800001	49950000	697	0.137056	-3.77064		101118465	HAO1
21	450001	600000	580	0.13752	-3.76049	101119170;101106726;101118909	101106980;101106473	TAF1D;MED17;C21H11orf54;CEP295;VSTM5
14	10650001	10800000	402	0.138044	-3.74902
13	51525001	51675000	601	0.138089	-3.74804	101103001;101113000;105606248;101102580;101103413;101113260	105606246	PCED1A;TMEM239;LOC105606248;VPS16;CPXM1;C13H20orf141;EBF4
17	44550001	44700000	442	0.138311	-3.7432	101112347;105602840;101112597	101117449	NOC4L;LOC105602840;DDX51;EP400
1	7200001	7350000	626	0.138372	-3.74186		101112442;101104791	DGKD;USP40
17	52350001	52500000	622	0.138455	-3.74004	101102014;101120018	101120274	LOC101102014;KNTC1;RSRC2
24	41550001	41700000	777	0.138767	-3.73322	106991921;101115933;106991923;106991922	105604883	LOC106991921;DNAAF5;LOC106991923;LOC106991922;LOC105604883
6	80100001	80250000	1230	0.138872	-3.73092
1	266475001	266625000	1263	0.139054	-3.72696	101109068;101116195	101115929	CLDN14;CHAF1B;MORC3
5	78300001	78450000	1073	0.139078	-3.72642	106991160	101121934	LOC106991160;RASGRF2
17	52725001	52875000	663	0.139101	-3.72592	101102760;101102267;101102515;105602872	101121971;101103013	MLXIP;B3GNT4;LRRC43;LOC105602872;DIABLO;BCL7A
6	116100001	116250000	552	0.139255	-3.72255	101104910		CTBP1
4	49725001	49875000	635	0.139492	-3.71737	105613811	105613812;101107276	LOC105613811;LOC105613812;EPDR1
3	124575001	124725000	589	0.13961	-3.71478		443371	KITLG
15	2775001	2925000	1474	0.139643	-3.71407	101117013;101117272		LOC101117013;LOC101117272
3	124350001	124500000	1057	0.139766	-3.71137		443371	KITLG
2	115875001	116025000	1027	0.140071	-3.70471	105608728	105610849	LOC105608728;LOC105610849
3	11025001	11175000	632	0.140318	-3.69931	102465814;105611269	100302637	MIR181A-2;LOC105611269;NR6A1
16	70575001	70725000	446	0.140449	-3.69645	494437;101103266	101109301	SLC9A3;EXOC3;AHRR
16	71175001	71325000	926	0.141004	-3.6843	101110873;105608080;105602659;101111127		LOC101110873;LOC105608080;LOC105602659;IRX4
18	23550001	23700000	763	0.141184	-3.68038	101107903		MEX3B
5	78375001	78525000	1034	0.141192	-3.6802	106991160;101122189	101121934	LOC106991160;CKMT2;RASGRF2
1	20475001	20625000	498	0.14121	-3.6798	101102099;101102347;101101845	101123247;101102597	POMGNT1;LURAP1;TSPAN1;PIK3R3;RAD54L
13	62325001	62475000	407	0.141392	-3.67583	101117268;101110436;101117009;101110695	101110957;101117526	NECAB3;CBFA2T2;LOC101117009;C13H20orf144;PXMP4;E2F1
3	106800001	106950000	298	0.141465	-3.67422
10	37425001	37575000	792	0.141789	-3.66713
3	111300001	111450000	1135	0.141874	-3.66529
1	50775001	50925000	690	0.142763	-3.64584	101107567	101107837	LHX8;SLC44A5
15	47475001	47625000	1113	0.14284	-3.64415	101106199;101105186;101103422;101104685;101104933;101104177;101105945;101104426;101103180;101103921;101103670	101105685	LOC101106199;LOC101105186;LOC101103422;LOC101104685;LOC101104933;LOC101104177;LOC101105945;LOC101104426;LOC101103180;LOC101103921;LOC101103670;LOC101105685
22	22050001	22200000	293	0.14334	-3.63323	101114741;101107917;101107649;443119	101107150	FBXL15;CUEDC2;PSD;NFKB2;GBF1
6	24600001	24750000	1153	0.143395	-3.63203	106990491		LOC106990491
17	51000001	51150000	640	0.143667	-3.62608	105602860;101115905	101121042	LOC105602860;LOC101115905;NCOR2
20	51000001	51150000	121	0.143675	-3.62591
24	36150001	36300000	725	0.144226	-3.61386	102465808;101107493;105604793;101123178;106991893;101107250;106990099;101110990;101107757;101108015;102465992	101111419	MIR106B;CNPY4;LOC105604793;TAF6;LOC106991893;MBLAC1;COPS6;ZNF3;AP4M1;MCM7;MIR25;ZKSCAN1
3	11100001	11250000	519	0.144471	-3.60849	100302637;443464		NR6A1;NR5A1
7	32175001	32325000	879	0.145115	-3.59442	101106433	101106849	THBS1;FSIP1
3	42675001	42825000	989	0.145475	-3.58655		101117408	SPRED2
17	52125001	52275000	554	0.145818	-3.57903	101123071;101123327;101119252	101123584;101118989	VPS37B;HIP1R;ABCB9;CCDC62;OGFOD2
3	213150001	213300000	829	0.145824	-3.5789	443298;105609492;101123025;105609489;101123544;101123285;101122773;105609488;101101972;101118867	101119130	LGALS1;LOC105609492;GGA1;LOC105609489;PDXP;SH3BP1;CDC42EP1;LOC105609488;NOL12;LGALS2;LOC101119130
3	103725001	103875000	649	0.145926	-3.57668	101112636;101113316;101114947	101113574	ITPRIPL1;SNRNP200;NEURL3;CIAO1
15	80550001	80700000	340	0.14619	-3.57092
11	34125001	34275000	281	0.146214	-3.57037	105616347;101112660;100329218	101112148	LOC105616347;RAI1;SREBF1;TOM1L2
17	52200001	52350000	782	0.146235	-3.56992	101123327;101123584;101119506;101119758	101123071	HIP1R;CCDC62;DENR;HCAR1;VPS37B
24	34800001	34950000	348	0.146404	-3.56623		101120041	CUX1
2	115200001	115350000	1098	0.146505	-3.56402	101117569		LOC101117569
10	7725001	7875000	1235	0.146539	-3.56326
3	102000001	102150000	1062	0.146715	-3.55942	105614681	101111874;101108208	LOC105614681;KIAA1211L;TSGA10
2	234450001	234600000	517	0.14676	-3.55844	101117566;101117825	101117141	TMEM39B;KHDRBS1;KPNA6
17	50850001	51000000	550	0.146962	-3.55402		101121042	NCOR2
11	55125001	55275000	562	0.147248	-3.54776	101110157;101110856;101121951;101111302;101110428;101121694;101121439;100217405	101109893;101122203	MRPS7;NUP85;NT5C;HN1;GGA3;SUMO2;MIF4GD;SLC25A19;GRB2;ARMC7
12	53850001	54000000	302	0.147491	-3.54246		101115296;106991446	RABGAP1L;LOC106991446
5	51300001	51450000	663	0.147546	-3.54126		101109966	ARHGAP26
2	51300001	51450000	489	0.147991	-3.53153		101108453;101108719	ZCCHC7;PAX5
19	23175001	23325000	1047	0.148059	-3.53003		101112093	CNTN4
3	101925001	102075000	990	0.148315	-3.52444	101107774;105614680;101108208	101107510	LIPT1;LOC105614680;TSGA10;MITD1
13	51450001	51600000	420	0.148337	-3.52397	101103001;101102580	101101909	PCED1A;VPS16;PTPRA
1	118200001	118350000	315	0.148779	-3.5143	101117126	101116363	GPR161;DCAF6
3	124500001	124650000	914	0.148798	-3.51389		443371	KITLG
7	72525001	72675000	797	0.148999	-3.50948	105615745	101107792	LOC105615745;PPP2R5E
22	50550001	50700000	824	0.149079	-3.50774	101113117;101112867;100568285;101112616;105604359		FUOM;ECHS1;CYP2E1;LOC101112616;LOC105604359
18	22575001	22725000	519	0.149094	-3.50741	101106886	101111579	LOC101106886;TM6SF1
17	45450001	45600000	1002	0.149645	-3.49536
3	106200001	106350000	131	0.150085	-3.48573	101119550;105611972;101120071;105611973;106990993;101119810		LOC101119550;LOC105611972;LOC101120071;LOC105611973;LOC106990993;LOC101119810
2	122250001	122400000	901	0.150239	-3.48236	101122056		LOC101122056
10	35775001	35925000	330	0.150517	-3.47629	101117678;105611673;101117597;101117941	101117344;101118197	LOC101117678;LOC105611673;SAP18;LATS2;SKA3;XPO4
18	22725001	22875000	579	0.15057	-3.47513	101107140		BNC1
1	131175001	131325000	668	0.150725	-3.47174
20	10800001	10950000	953	0.150749	-3.47122	105603679;101121978;101122471;101122225;101102940	101103192	LOC105603679;PPIL1;PI16;C20H6orf89;MTCH1;FGD2
18	32400001	32550000	651	0.150768	-3.47081	105603154;101106884	105603153	LOC105603154;C18H15orf39;LOC105603153
6	83025001	83175000	1207	0.151562	-3.45344	443459;101115032;105612991		CENPC;STAP1;LOC105612991
11	40125001	40275000	452	0.15167	-3.45107	443470;101108501;101109025;101108762		IGFBP4;GJD3;TNS4;TOP2A
13	53625001	53775000	458	0.152036	-3.44307	101111114;101119410;101110694;101119924;101119661	101120183	GID8;BHLHE23;SLC17A9;TCFL5;DIDO1;COL9A3
7	14700001	14850000	771	0.152273	-3.43789	678673;100037684	101104493;105608741	CLN6;CALML4;PIAS1;LOC105608741
4	23700001	23850000	780	0.152288	-3.43756		101103313	AGMO
16	70500001	70650000	425	0.152381	-3.43554	101109301;101109042	100036762;101103266	AHRR;PDCD6;SDHA;EXOC3
11	27300001	27450000	476	0.152554	-3.43174	101107368;101106860;101107111;101101820;101122451;101101785;101122962;101101800;101106184;100174984;101123219;101106602;101122709	106991397;101107803	SLC25A35;AURKB;RANGRF;TRNAD-GUC;VAMP2;TRNAI-AAU;PFAS;TRNAP-CGG;TMEM107;PER1;LOC101123219;BORCS6;CTC1;LOC106991397;ARHGEF15
3	105150001	105300000	738	0.152778	-3.42684
22	1	150000	525	0.153016	-3.42164	106990541;101114149;106990544;106990543;106990542		LOC106990541;LOC101114149;LOC106990544;LOC106990543;LOC106990542
5	78450001	78600000	1074	0.153164	-3.41841	106990145;101122436;101122189	101118188;101121934;105606738	LOC106990145;ZCCHC9;CKMT2;ACOT12;RASGRF2;LOC105606738
5	41025001	41175000	210	0.153583	-3.40925	101115209;101118019;101101816;101114702;101114192;101114443;101114955;101117758		DAZAP1;LOC101118019;TRNAN-GUU;NDUFS7;C5H19orf24;EFNA2;GAMT;CIRBP
1	119400001	119550000	473	0.153676	-3.40722	101120123;101120370		SLC5A3;MRPS6
5	75675001	75825000	944	0.153797	-3.40457
2	73650001	73800000	521	0.153957	-3.40107	101116453;101119963	101116705;101119701	RANBP6;LOC101119963;IL33;KIAA2026
5	107775001	107925000	131	0.153994	-3.40026		101108571	STARD4
20	16725001	16875000	423	0.154113	-3.39765	101111402;101111670;101114062	101111916;101111135	SRF;DNPH1;CUL9;TTBK1;PTK7
9	3600001	3750000	500	0.154277	-3.39406		101102741;101108058	SDHAF4;FAM135A
3	105450001	105600000	549	0.154369	-3.39205		105611978	LOC105611978
2	86625001	86775000	596	0.154899	-3.38046		101122835	ADAMTSL1
13	50100001	50250000	679	0.155061	-3.37693	100170316;105616786;101118975		ADRA1D;LOC105616786;SMOX
3	97875001	98025000	940	0.15527	-3.37236
10	7650001	7800000	1227	0.155334	-3.37097
2	51225001	51375000	459	0.155374	-3.37008		101108453	ZCCHC7
17	52425001	52575000	506	0.155415	-3.36918	101120274;101120863	101121120;101120018	RSRC2;ZCCHC8;CLIP1;KNTC1
16	70800001	70950000	513	0.155443	-3.36858	105602658;101110620;101110090;101110363	101109828	LOC105602658;TRIP13;TPPP;BRD9;CEP72
19	48675001	48825000	541	0.155463	-3.36814	101112604;101113105	101112853	DUSP7;POC1A;ALAS1
3	119325001	119475000	690	0.155581	-3.36555
22	50475001	50625000	657	0.155785	-3.36109	101112366;101111846;100302330;101118653;105604359;101112101	101111594	LOC101112366;LOC101111846;SPRN;MTG1;LOC105604359;LOC101112101;PAOX
19	22050001	22200000	673	0.155957	-3.35733	105603431	105603432	LOC105603431;LOC105603432
15	53100001	53250000	486	0.156148	-3.35315	101109997;105602306;101108161;101110266;105602307	101110535	LOC101109997;LOC105602306;LOC101108161;LOC101110266;LOC105602307;DGAT2
7	55950001	56100000	483	0.156203	-3.35195	106991280;105607294	100144423;101105662	LOC106991280;LOC105607294;CYP19;GLDN
13	56175001	56325000	601	0.156209	-3.35181	101114458	105616728	EDN3;LOC105616728
12	53100001	53250000	527	0.156297	-3.3499	101113947;101114454;101114203;443407;101113689	101113256	LOC101113947;ZBTB37;DARS2;SERPINC1;CENPL;KLHL20
4	101700001	101850000	795	0.156301	-3.34982

[truncated: 20 more sheets: Table S11, Table S12, Table S13, Table S14, Table S15, Table S16, Table S17, Table S18, Table S19, Table S20, Table S21, Table S22, Table S23, Table S24, Table S25, Table S26, Table S27, Table S28, Table S29, Sheet1]
